# Supplementary material for: Lipidomic Profiling Reveals Biological Differences between Tumors of Self-Identified African Americans and Non-Hispanic Whites with Cancer
Source: MDPI journal article supplement (doi:10.3390/cancers15082238), 2023-04-11
Supplement: s1 [file s1]

| acyl<br>chain-<br>length | LUAD           | ceramide       |                |                | monohexosylceramide |                |                | sphingomyelin  |         |            | lactosylceramide |                |                |
|--------------------------|----------------|----------------|----------------|----------------|---------------------|----------------|----------------|----------------|---------|------------|------------------|----------------|----------------|
|                          | comparison     | means<br>diff. | p              | p-adj. (q)     | means<br>diff.      | p              | p-adj. (q)     | means<br>diff. | p       | p-adj. (q) | means<br>diff.   | p              | p-adj. (q)     |
| <b>14:0</b>              | unin. vs tumor | 0.1            | 8.9E-01        | 7.2E-01        | 0.1                 | 9.3E-01        | 7.2E-01        | 0.0            | 9.9E-01 | 1.0E+00    | 0.1              | 9.5E-01        | 9.3E-01        |
| <b>16:0</b>              | unin. vs tumor | 2.1            | <b>9.8E-03</b> | <b>2.4E-02</b> | 2.6                 | <b>1.5E-05</b> | <b>3.6E-05</b> | 2.9            | 3.6E-01 | 1.0E+00    | 2.4              | <b>3.1E-03</b> | <b>3.0E-02</b> |
| <b>18:1</b>              | unin. vs tumor | 0.0            | 9.8E-01        | 7.2E-01        | 0.1                 | 9.2E-01        | 7.2E-01        | 0.2            | 9.6E-01 | 1.0E+00    | 0.1              | 9.4E-01        | 9.3E-01        |
| <b>18:0</b>              | unin. vs tumor | 0.1            | 8.7E-01        | 7.2E-01        | 0.0                 | 9.6E-01        | 7.2E-01        | 0.8            | 8.1E-01 | 1.0E+00    | 0.1              | 8.6E-01        | 9.3E-01        |
| <b>20:0</b>              | unin. vs tumor | 0.3            | 7.2E-01        | 7.2E-01        | 0.0                 | 9.8E-01        | 7.2E-01        | 2.1            | 5.2E-01 | 1.0E+00    | 0.0              | 9.6E-01        | 9.3E-01        |
| <b>22:0</b>              | unin. vs tumor | 1.4            | 8.5E-02        | 1.6E-01        | 0.8                 | 2.0E-01        | 3.6E-01        | 0.4            | 8.9E-01 | 1.0E+00    | 0.4              | 5.9E-01        | 9.3E-01        |
| <b>24:1</b>              | unin. vs tumor | 6.9            | <b>1.0E-15</b> | <b>1.0E-15</b> | 6.2                 | <b>1.0E-15</b> | <b>1.0E-15</b> | 2.5            | 4.3E-01 | 1.0E+00    | 1.3              | 9.5E-02        | 4.1E-01        |
| <b>24:0</b>              | unin. vs tumor | 3.6            | <b>1.1E-05</b> | <b>4.1E-05</b> | 3.3                 | <b>9.2E-08</b> | <b>3.4E-07</b> | 0.6            | 8.6E-01 | 1.0E+00    | 1.2              | 1.3E-01        | 4.1E-01        |
| <b>26:1</b>              | unin. vs tumor | 0.3            | 7.3E-01        | 7.2E-01        | 0.2                 | 6.8E-01        | 7.2E-01        | -0.5           | 8.8E-01 | 1.0E+00    | 0.0              | 9.5E-01        | 9.3E-01        |
| <b>26:0</b>              | unin. vs tumor | 0.1            | 8.5E-01        | 7.2E-01        | 0.1                 | 9.2E-01        | 7.2E-01        | -0.1           | 9.8E-01 | 1.0E+00    | 0.0              | 9.9E-01        | 9.3E-01        |

| species           | LUAD           | LCBs           |         |            |
|-------------------|----------------|----------------|---------|------------|
|                   | comparison     | means<br>diff. | p       | p-adj. (q) |
| <b>d18:1 So</b>   | unin. vs tumor | -0.03          | 9.7E-01 | 1.0E+00    |
| <b>d18:0 Sa</b>   | unin. vs tumor | 0.07           | 7.6E-01 | 1.0E+00    |
| <b>d18:1 So1P</b> | unin. vs tumor | 0.03           | 9.0E-01 | 1.0E+00    |
| <b>d18:0 Sa1P</b> | unin. vs tumor | 0.00           | 9.9E-01 | 1.0E+00    |

**Supplemental Table S1.** Uncorrected (p) and FDR/BKY-adjusted (Q=0.05%) p-values (q) for unin. versus tumor comparisons with LUAD tissues. For this analysis, data from AA and NHW were combined. Statistically significant values are in bold text. Positive means diff. values indicate corresponding lipid species is higher in the tumor than in the unin. tissue. The lower limit of p- and q-value calculations were set to 1.0E-15 (Prism), so no values are reported lower than this limit. Alterations considered significant ( $\alpha \leq 0.05$ ,  $q \leq 0.05$ ) are in bold text. Means differences (means diff.) were calculated following ANOVA analysis (Prism).

| <i>acyl<br/>chain-<br/>length</i> | EEC                   | ceramide               |                |                   | monohexosylceramide    |                |                   | sphingomyelin          |                |                   | lactosylceramide       |                |                   |
|-----------------------------------|-----------------------|------------------------|----------------|-------------------|------------------------|----------------|-------------------|------------------------|----------------|-------------------|------------------------|----------------|-------------------|
|                                   | <i>comparison</i>     | <i>means<br/>diff.</i> | <i>p</i>       | <i>p-adj. (q)</i> |
| <b>14:0</b>                       | <i>unin. vs tumor</i> | 0.2                    | 7.3E-01        | 5.1E-01           | 0.4                    | 6.1E-01        | 5.2E-01           | 4.4                    | <b>1.6E-04</b> | <b>2.8E-04</b>    | 0.2                    | 8.4E-01        | 7.1E-01           |
| <b>16:0</b>                       | <i>unin. vs tumor</i> | 1.7                    | <b>1.1E-02</b> | <b>1.7E-02</b>    | 7.4                    | <b>1.0E-15</b> | <b>1.0E-15</b>    | 3.5                    | <b>2.8E-03</b> | <b>2.9E-03</b>    | 11.7                   | <b>1.0E-15</b> | <b>1.0E-15</b>    |
| <b>18:1</b>                       | <i>unin. vs tumor</i> | 0.0                    | 9.8E-01        | 6.2E-01           | 0.2                    | 8.2E-01        | 5.2E-01           | -0.2                   | 8.7E-01        | 5.0E-01           | 0.3                    | 7.2E-01        | 7.1E-01           |
| <b>18:0</b>                       | <i>unin. vs tumor</i> | 0.3                    | 6.2E-01        | 4.9E-01           | 0.2                    | 8.0E-01        | 5.2E-01           | -1.6                   | 1.5E-01        | 1.3E-01           | 0.1                    | 9.1E-01        | 7.1E-01           |
| <b>20:0</b>                       | <i>unin. vs tumor</i> | 0.7                    | 2.7E-01        | 3.4E-01           | 0.3                    | 6.9E-01        | 5.2E-01           | 0.1                    | 9.5E-01        | 5.0E-01           | 0.1                    | 8.8E-01        | 7.1E-01           |
| <b>22:0</b>                       | <i>unin. vs tumor</i> | 3.7                    | <b>2.2E-08</b> | <b>4.6E-08</b>    | 3.5                    | <b>4.7E-05</b> | <b>7.5E-05</b>    | 3.9                    | <b>7.2E-04</b> | <b>9.5E-04</b>    | 0.9                    | 3.2E-01        | 5.8E-01           |
| <b>24:1</b>                       | <i>unin. vs tumor</i> | 8.4                    | <b>1.0E-15</b> | <b>1.0E-15</b>    | 4.6                    | <b>1.7E-07</b> | <b>3.5E-07</b>    | 7.4                    | <b>2.7E-10</b> | <b>7.2E-10</b>    | 2.5                    | <b>3.6E-03</b> | <b>8.9E-03</b>    |
| <b>24:0</b>                       | <i>unin. vs tumor</i> | 11.0                   | <b>1.0E-15</b> | <b>1.0E-15</b>    | 12.7                   | <b>1.0E-15</b> | <b>1.0E-15</b>    | 9.6                    | <b>1.0E-15</b> | <b>5.0E-15</b>    | 3.6                    | <b>3.3E-05</b> | <b>1.2E-04</b>    |
| <b>26:1</b>                       | <i>unin. vs tumor</i> | 0.4                    | 5.1E-01        | 4.9E-01           | 0.3                    | 7.4E-01        | 5.2E-01           | 1.1                    | 3.4E-01        | 2.2E-01           | 0.1                    | 9.4E-01        | 7.1E-01           |
| <b>26:0</b>                       | <i>unin. vs tumor</i> | 0.4                    | 5.6E-01        | 4.9E-01           | 0.5                    | 5.2E-01        | 5.2E-01           | 1.4                    | 2.2E-01        | 1.7E-01           | 0.0                    | 9.7E-01        | 7.1E-01           |

| <i>species</i>    | EEC                   | LCBs                   |                |                   |
|-------------------|-----------------------|------------------------|----------------|-------------------|
|                   | <i>comparison</i>     | <i>means<br/>diff.</i> | <i>p</i>       | <i>p-adj. (q)</i> |
| <b>d18:1 So</b>   | <i>unin. vs tumor</i> | 174.69                 | <b>2.2E-07</b> | <b>6.9E-07</b>    |
| <b>d18:0 Sa</b>   | <i>unin. vs tumor</i> | 14.30                  | <b>9.6E-09</b> | <b>2.0E-08</b>    |
| <b>d18:1 So1P</b> | <i>unin. vs tumor</i> | 1.38                   | 7.5E-02        | 1.6E-01           |
| <b>d18:0 Sa1P</b> | <i>unin. vs tumor</i> | 0.85                   | 2.4E-01        | 2.5E-01           |

**Supplemental Table S2.** Uncorrected (p) and FDR/BKY-adjusted (Q=0.05%) p-values (q) for unin. versus tumor comparisons with EEC tissues. For this analysis, data from AA and NHW were combined. Statistically significant values are in bold text. Positive means diff. values indicate corresponding lipid species is higher in the tumor than in the unin. tissue. The lower limit of p- and q-value calculations were set to 1.0E-15 (Prism), so no values are reported lower than this limit. Alterations considered significant ( $\alpha \leq 0.05$ ,  $q \leq 0.05$ ) are in bold text. Means differences (means diff.) were calculated following ANOVA analysis (Prism).

| acyl<br>chain-<br>length | COAD           | ceramide       |                |                | monohexosylceramide |                |                | sphingomyelin  |                |                | lactosylceramide |                |                |
|--------------------------|----------------|----------------|----------------|----------------|---------------------|----------------|----------------|----------------|----------------|----------------|------------------|----------------|----------------|
|                          | comparison     | means<br>diff. | p              | p-adj. (q)     | means<br>diff.      | p              | p-adj.<br>(q)  | means<br>diff. | p              | p-adj.<br>(q)  | means<br>diff.   | p              | p-adj.<br>(q)  |
| <b>14:0</b>              | unin. vs tumor | 0.2            | 7.8E-01        | 7.3E-01        | 0.2                 | 7.2E-01        | 7.3E-01        | 2.8            | <b>9.3E-03</b> | <b>1.5E-02</b> | 0.1              | 9.3E-01        | 8.4E-01        |
| <b>16:0</b>              | unin. vs tumor | 2.3            | <b>2.1E-03</b> | 5.2E-03        | 4.9                 | <b>1.0E-15</b> | <b>1.0E-15</b> | 3.7            | <b>6.7E-04</b> | <b>2.1E-03</b> | 15.9             | <b>1.0E-15</b> | <b>1.0E-15</b> |
| <b>18:1</b>              | unin. vs tumor | 0.0            | 9.8E-01        | 7.3E-01        | 0.1                 | 8.7E-01        | 7.3E-01        | -0.4           | 7.3E-01        | 5.7E-01        | 0.0              | 9.9E-01        | 8.4E-01        |
| <b>18:0</b>              | unin. vs tumor | 0.0            | 9.9E-01        | 7.3E-01        | 0.0                 | 9.9E-01        | 7.3E-01        | -3.9           | <b>2.8E-04</b> | <b>1.8E-03</b> | 0.1              | 9.6E-01        | 8.4E-01        |
| <b>20:0</b>              | unin. vs tumor | 0.0            | 9.9E-01        | 7.3E-01        | 0.0                 | 1.0E+00        | 7.3E-01        | -3.4           | <b>1.6E-03</b> | <b>3.3E-03</b> | 0.0              | 9.9E-01        | 8.4E-01        |
| <b>22:0</b>              | unin. vs tumor | 1.2            | 1.1E-01        | 2.0E-01        | 1.2                 | <b>3.6E-02</b> | 6.6E-02        | -2.0           | 6.9E-02        | 8.6E-02        | 0.8              | 4.6E-01        | 8.4E-01        |
| <b>24:1</b>              | unin. vs tumor | 7.2            | <b>1.0E-15</b> | <b>1.0E-15</b> | 2.3                 | <b>5.4E-05</b> | <b>1.3E-04</b> | 0.8            | 4.4E-01        | 3.9E-01        | 3.3              | <b>2.4E-03</b> | <b>1.0E-02</b> |
| <b>24:0</b>              | unin. vs tumor | 4.5            | <b>8.7E-10</b> | <b>3.2E-09</b> | 6.1                 | <b>1.0E-15</b> | <b>1.0E-15</b> | 0.9            | 4.2E-01        | 3.9E-01        | 2.3              | <b>2.9E-02</b> | <b>8.0E-02</b> |
| <b>26:1</b>              | unin. vs tumor | 0.2            | 7.4E-01        | 7.3E-01        | 0.1                 | 8.1E-01        | 7.3E-01        | -0.1           | 9.1E-01        | 6.1E-01        | 0.1              | 9.4E-01        | 8.4E-01        |
| <b>26:0</b>              | unin. vs tumor | 0.2            | 8.0E-01        | 7.3E-01        | 0.2                 | 6.9E-01        | 7.3E-01        | 0.0            | 9.7E-01        | 6.1E-01        | 0.0              | 9.9E-01        | 8.4E-01        |

| species           | COAD           | LCBs           |                |                |
|-------------------|----------------|----------------|----------------|----------------|
|                   | comparison     | means<br>diff. | p              | p-adj.<br>(q)  |
| <b>d18:1 So</b>   | unin. vs tumor | 4.75           | <b>5.7E-04</b> | <b>1.7E-03</b> |
| <b>d18:0 Sa</b>   | unin. vs tumor | 6.95           | <b>6.5E-06</b> | <b>2.0E-05</b> |
| <b>d18:1 So1P</b> | unin. vs tumor | 0.03           | 6.3E-01        | 6.3E-01        |
| <b>d18:0 Sa1P</b> | unin. vs tumor | 0.08           | 1.9E-01        | 3.4E-01        |

**Supplemental Table S3.** Uncorrected (p) and FDR/BKY-adjusted (Q=0.05%) p-values (q) for unin. versus tumor comparisons with COAD tissues. For this analysis, data from AA and NHW were combined. Statistically significant values are in bold text. Positive means diff. values indicate corresponding lipid species is higher in the tumor than in the unin. tissue. The lower limit of p- and q-value calculations were set to 1.0E-15 (Prism), so no values are reported lower than this limit. Alterations considered significant ( $\alpha \leq 0.05$ ,  $q \leq 0.05$ ) are in bold text. Means differences (means diff.) were calculated following ANOVA analysis (Prism).

| <i>acyl<br/>chain-<br/>length</i> | HCC                   | ceramide               |          |                   | monohexosylceramide    |                |                       | sphingomyelin          |          |                       | lactosylceramide       |                |                       |
|-----------------------------------|-----------------------|------------------------|----------|-------------------|------------------------|----------------|-----------------------|------------------------|----------|-----------------------|------------------------|----------------|-----------------------|
|                                   | <i>comparison</i>     | <i>means<br/>diff.</i> | <i>p</i> | <i>p-adj. (q)</i> | <i>means<br/>diff.</i> | <i>p</i>       | <i>p-adj.<br/>(q)</i> | <i>means<br/>diff.</i> | <i>p</i> | <i>p-adj.<br/>(q)</i> | <i>means<br/>diff.</i> | <i>p</i>       | <i>p-adj.<br/>(q)</i> |
| <b>14:0</b>                       | <i>unin. vs tumor</i> | 0.1                    | 9.6E-01  | 1.0E+00           | 0.0                    | 9.9E-01        | 8.4E-01               | -1.1                   | 6.7E-01  | 1.0E+00               | -0.1                   | 9.4E-01        | 1.0E+00               |
| <b>16:0</b>                       | <i>unin. vs tumor</i> | 1.3                    | 6.1E-01  | 1.0E+00           | 0.1                    | 9.2E-01        | 8.4E-01               | -0.4                   | 8.6E-01  | 1.0E+00               | -2.6                   | <b>1.9E-02</b> | 9.7E-02               |
| <b>18:1</b>                       | <i>unin. vs tumor</i> | 0.5                    | 8.5E-01  | 1.0E+00           | 0.0                    | 1.0E+00        | 8.4E-01               | 0.1                    | 9.6E-01  | 1.0E+00               | 0.1                    | 9.5E-01        | 1.0E+00               |
| <b>18:0</b>                       | <i>unin. vs tumor</i> | 0.0                    | 9.9E-01  | 1.0E+00           | 0.0                    | 9.9E-01        | 8.4E-01               | -0.5                   | 8.4E-01  | 1.0E+00               | 0.1                    | 9.6E-01        | 1.0E+00               |
| <b>20:0</b>                       | <i>unin. vs tumor</i> | -0.5                   | 8.5E-01  | 1.0E+00           | 0.0                    | 9.6E-01        | 8.4E-01               | -3.0                   | 2.3E-01  | 7.0E-01               | -0.1                   | 9.2E-01        | 1.0E+00               |
| <b>22:0</b>                       | <i>unin. vs tumor</i> | -0.3                   | 9.1E-01  | 1.0E+00           | -2.4                   | <b>3.7E-03</b> | <b>1.6E-02</b>        | -4.5                   | 6.7E-02  | 7.0E-01               | -2.6                   | <b>1.7E-02</b> | 9.7E-02               |
| <b>24:1</b>                       | <i>unin. vs tumor</i> | 4.4                    | 8.7E-02  | 9.2E-01           | 0.0                    | 9.9E-01        | 8.4E-01               | -2.8                   | 2.7E-01  | 7.0E-01               | -1.0                   | 3.6E-01        | 9.4E-01               |
| <b>24:0</b>                       | <i>unin. vs tumor</i> | 0.6                    | 8.1E-01  | 1.0E+00           | -3.8                   | <b>4.2E-06</b> | <b>3.6E-05</b>        | -3.0                   | 2.2E-01  | 7.0E-01               | -2.0                   | 6.8E-02        | 2.4E-01               |
| <b>26:1</b>                       | <i>unin. vs tumor</i> | 0.4                    | 8.8E-01  | 1.0E+00           | 0.1                    | 9.4E-01        | 8.4E-01               | 0.1                    | 9.6E-01  | 1.0E+00               | 0.0                    | 9.9E-01        | 1.0E+00               |
| <b>26:0</b>                       | <i>unin. vs tumor</i> | 0.1                    | 9.7E-01  | 1.0E+00           | 0.0                    | 9.6E-01        | 8.4E-01               | -0.4                   | 8.6E-01  | 1.0E+00               | 0.0                    | 9.9E-01        | 1.0E+00               |

| <i>species</i>    | HCC                   | LCBs                   |                |                       |
|-------------------|-----------------------|------------------------|----------------|-----------------------|
|                   | <i>comparison</i>     | <i>means<br/>diff.</i> | <i>p</i>       | <i>p-adj.<br/>(q)</i> |
| <b>d18:1 So</b>   | <i>unin. vs tumor</i> | -8.70                  | <b>6.9E-03</b> | <b>2.7E-02</b>        |
| <b>d18:0 Sa</b>   | <i>unin. vs tumor</i> | -5.49                  | <b>1.6E-03</b> | <b>4.9E-03</b>        |
| <b>d18:1 So1P</b> | <i>unin. vs tumor</i> | -0.10                  | <b>2.6E-02</b> | 5.2E-02               |
| <b>d18:0 Sa1P</b> | <i>unin. vs tumor</i> | 0.00                   | 1.0E+00        | 1.0E+00               |

**Supplemental Table S4.** Uncorrected (p) and FDR/BKY-adjusted (Q=0.05%) p-values (q) for unin. versus tumor comparisons with HCC tissues. For this analysis, data from AA and NHW were combined. Statistically significant values are in bold text. Positive means diff. values indicate corresponding lipid species is higher in the tumor than in the unin. tissue. The lower limit of p- and q-value calculations were set to 1.0E-15 (Prism), so no values are reported lower than this limit. Alterations considered significant ( $\alpha \leq 0.05$ ,  $q \leq 0.05$ ) are in bold text. Means differences (means diff.) were calculated following ANOVA analysis (Prism).

| <i>acyl<br/>chain-<br/>length</i> | HNSCC                 | ceramide               |                |                   | monohexosylceramide    |                |                   | sphingomyelin          |                |                   | lactosylceramide       |                |                   |
|-----------------------------------|-----------------------|------------------------|----------------|-------------------|------------------------|----------------|-------------------|------------------------|----------------|-------------------|------------------------|----------------|-------------------|
|                                   | <i>comparison</i>     | <i>means<br/>diff.</i> | <i>p</i>       | <i>p-adj. (q)</i> |
| <b>14:0</b>                       | <i>unin. vs tumor</i> | 0.8                    | 5.1E-01        | 2.9E-01           | 0.1                    | 9.3E-01        | 8.3E-01           | 5.3                    | 9.3E-02        | 3.2E-01           | 0.3                    | 9.2E-01        | 7.0E-01           |
| <b>16:0</b>                       | <i>unin. vs tumor</i> | 7.6                    | <b>7.0E-11</b> | <b>1.8E-10</b>    | 5.6                    | <b>1.4E-03</b> | <b>6.1E-03</b>    | -3.4                   | 2.8E-01        | 5.9E-01           | 38.1                   | <b>1.0E-15</b> | <b>1.0E-15</b>    |
| <b>18:1</b>                       | <i>unin. vs tumor</i> | 0.1                    | 9.5E-01        | 5.0E-01           | 0.0                    | 9.9E-01        | 8.3E-01           | -1.8                   | 5.8E-01        | 8.8E-01           | 0.2                    | 9.5E-01        | 7.0E-01           |
| <b>18:0</b>                       | <i>unin. vs tumor</i> | 0.9                    | 4.4E-01        | 2.9E-01           | 0.5                    | 7.8E-01        | 8.2E-01           | -6.1                   | 5.4E-02        | 2.8E-01           | 0.5                    | 8.7E-01        | 7.0E-01           |
| <b>20:0</b>                       | <i>unin. vs tumor</i> | 2.0                    | 8.0E-02        | 7.0E-02           | 0.8                    | 6.5E-01        | 8.2E-01           | -1.4                   | 6.7E-01        | 8.8E-01           | 0.2                    | 9.5E-01        | 7.0E-01           |
| <b>22:0</b>                       | <i>unin. vs tumor</i> | 3.5                    | <b>2.4E-03</b> | <b>2.5E-03</b>    | -0.9                   | 6.0E-01        | 8.2E-01           | 0.5                    | 8.7E-01        | 9.1E-01           | 4.7                    | 1.3E-01        | 2.5E-01           |
| <b>24:1</b>                       | <i>unin. vs tumor</i> | 5.0                    | <b>1.4E-05</b> | <b>1.8E-05</b>    | 3.2                    | 6.6E-02        | 1.9E-01           | 0.9                    | 7.9E-01        | 9.1E-01           | 23.0                   | <b>6.7E-13</b> | <b>2.5E-12</b>    |
| <b>24:0</b>                       | <i>unin. vs tumor</i> | 11.2                   | <b>1.0E-15</b> | <b>1.0E-15</b>    | 6.1                    | <b>4.7E-04</b> | <b>3.9E-03</b>    | 4.9                    | 1.2E-01        | 3.2E-01           | 13.5                   | <b>1.7E-05</b> | <b>4.1E-05</b>    |
| <b>26:1</b>                       | <i>unin. vs tumor</i> | 1.0                    | 3.8E-01        | 2.9E-01           | 3.0                    | 8.9E-02        | 1.9E-01           | 6.3                    | <b>4.9E-02</b> | 2.8E-01           | 0.8                    | 7.9E-01        | 7.0E-01           |
| <b>26:0</b>                       | <i>unin. vs tumor</i> | 6.7                    | <b>7.1E-09</b> | <b>1.2E-08</b>    | 0.7                    | 6.9E-01        | 8.2E-01           | 1.4                    | 6.7E-01        | 8.8E-01           | 0.2                    | 9.5E-01        | 7.0E-01           |

| <i>species</i>    | HNSCC                 | LCBs                   |          |                   |
|-------------------|-----------------------|------------------------|----------|-------------------|
|                   | <i>comparison</i>     | <i>means<br/>diff.</i> | <i>p</i> | <i>p-adj. (q)</i> |
| <b>d18:1 So</b>   | <i>unin. vs tumor</i> | -10.66                 | 5.5E-02  | 2.3E-01           |
| <b>d18:0 Sa</b>   | <i>unin. vs tumor</i> | -1.17                  | 6.4E-01  | 1.0E+00           |
| <b>d18:1 So1P</b> | <i>unin. vs tumor</i> | -0.49                  | 1.5E-01  | 3.1E-01           |
| <b>d18:0 Sa1P</b> | <i>unin. vs tumor</i> | 0.01                   | 9.9E-01  | 1.0E+00           |

**Supplemental Table S5.** Uncorrected (p) and FDR/BKY-adjusted (Q=0.05) p-values (q) for unin. versus tumor comparisons with HNSCC tissues. For this analysis, data from AA and NHW were combined. Statistically significant values are in bold text. Means diff. values that are positive indicate that the corresponding lipid species is higher in the tumor than in the unin. tissue. The lower limit of p- and q-value calculations were set to 1.0E-15 (Prism), so no values are reported lower than this limit. Alterations considered significant ( $\alpha \leq 0.05$ ,  $q \leq 0.05$ ) are in bold text. Means differences (means diff.) were calculated following ANOVA analysis (Prism).

| <i>acyl<br/>chain-<br/>length</i> | LUAD AA              | ceramide               |                |                   | monohexosylceramide    |                |                   | sphingomyelin          |          |                   | lactosylceramide       |                |                   |
|-----------------------------------|----------------------|------------------------|----------------|-------------------|------------------------|----------------|-------------------|------------------------|----------|-------------------|------------------------|----------------|-------------------|
|                                   | <i>comparison</i>    | <i>means<br/>diff.</i> | <i>p</i>       | <i>p-adj. (q)</i> | <i>means<br/>diff.</i> | <i>p</i>       | <i>p-adj. (q)</i> | <i>means<br/>diff.</i> | <i>p</i> | <i>p-adj. (q)</i> | <i>means<br/>diff.</i> | <i>p</i>       | <i>p-adj. (q)</i> |
| <b>14:0</b>                       | AA unin. vs AA tumor | 0.06                   | 9.6E-01        | 9.4E-01           | 0.05                   | 9.6E-01        | 8.4E-01           | -0.31                  | 9.7E-01  | 1.0E+00           | -0.01                  | 1.0E+00        | 1.0E+00           |
| <b>16:0</b>                       | AA unin. vs AA tumor | 0.99                   | 3.9E-01        | 9.1E-01           | 2.30                   | <b>3.2E-02</b> | 8.9E-02           | -1.47                  | 8.4E-01  | 1.0E+00           | 2.72                   | <b>1.0E-02</b> | 1.1E-01           |
| <b>18:1</b>                       | AA unin. vs AA tumor | -0.04                  | 9.7E-01        | 9.4E-01           | 0.03                   | 9.8E-01        | 8.4E-01           | 0.17                   | 9.8E-01  | 1.0E+00           | 0.03                   | 9.8E-01        | 1.0E+00           |
| <b>18:0</b>                       | AA unin. vs AA tumor | 0.00                   | 1.0E+00        | 9.4E-01           | -0.02                  | 9.8E-01        | 8.4E-01           | -1.00                  | 8.9E-01  | 1.0E+00           | 0.07                   | 9.5E-01        | 1.0E+00           |
| <b>20:0</b>                       | AA unin. vs AA tumor | 0.13                   | 9.1E-01        | 9.4E-01           | 0.00                   | 1.0E+00        | 8.4E-01           | 3.72                   | 6.2E-01  | 1.0E+00           | 0.00                   | 1.0E+00        | 1.0E+00           |
| <b>22:0</b>                       | AA unin. vs AA tumor | 1.13                   | 3.3E-01        | 9.1E-01           | 1.03                   | 3.4E-01        | 7.0E-01           | -4.28                  | 5.6E-01  | 1.0E+00           | 0.23                   | 8.2E-01        | 1.0E+00           |
| <b>24:1</b>                       | AA unin. vs AA tumor | 4.99                   | <b>1.9E-05</b> | <b>1.8E-04</b>    | 6.42                   | <b>6.4E-09</b> | <b>5.3E-08</b>    | 0.91                   | 9.0E-01  | 1.0E+00           | 0.86                   | 4.1E-01        | 1.0E+00           |
| <b>24:0</b>                       | AA unin. vs AA tumor | 2.09                   | 6.8E-02        | 3.2E-01           | 3.62                   | <b>8.0E-04</b> | <b>3.4E-03</b>    | 0.28                   | 9.7E-01  | 1.0E+00           | 0.58                   | 5.8E-01        | 1.0E+00           |
| <b>26:1</b>                       | AA unin. vs AA tumor | 0.11                   | 9.2E-01        | 9.4E-01           | 0.29                   | 7.9E-01        | 8.4E-01           | -0.84                  | 9.1E-01  | 1.0E+00           | 0.02                   | 9.9E-01        | 1.0E+00           |
| <b>26:0</b>                       | AA unin. vs AA tumor | 0.08                   | 9.5E-01        | 9.4E-01           | 0.06                   | 9.6E-01        | 8.4E-01           | 0.21                   | 9.8E-01  | 1.0E+00           | 0.00                   | 1.0E+00        | 1.0E+00           |

| LUAD AA           |                      | sphingoid bases    |                |                   |
|-------------------|----------------------|--------------------|----------------|-------------------|
| <i>species</i>    | <i>comparison</i>    | <i>means diff.</i> | <i>p</i>       | <i>p-adj. (q)</i> |
| <b>d18:1 So</b>   | AA unin. vs AA tumor | -1.57              | <b>4.8E-02</b> | 2.0E-01           |
| <b>d18:0 Sa</b>   | AA unin. vs AA tumor | -0.12              | 6.1E-01        | 1.0E+00           |
| <b>d18:1 So1P</b> | AA unin. vs AA tumor | 0.04               | 8.7E-01        | 1.0E+00           |
| <b>d18:0 Sa1P</b> | AA unin. vs AA tumor | 0.00               | 9.8E-01        | 1.0E+00           |

**Supplemental Table S6.** Uncorrected (p) and FDR/BKY-adjusted (Q=0.05) p-values (q) for unin. versus tumor comparisons with LUAD tissues from AA males. Means diff. values that are positive indicate that the corresponding lipid species is higher in the tumor than in the unin. tissue. The lower limit of p- and q-value calculations were set to 1.0E-15 (Prism), so no values are reported lower than this limit. Alterations considered significant ( $\alpha \leq 0.05$ ,  $q \leq 0.05$ ) are in bold text. Means differences (means diff.) were calculated following ANOVA analysis (Prism).

| <i>acyl<br/>chain-<br/>length</i> | EEC AA               | ceramide               |                |                   | monohexosylceramide    |                |                   | sphingomyelin          |                |                   | lactosylceramide       |                |                   |
|-----------------------------------|----------------------|------------------------|----------------|-------------------|------------------------|----------------|-------------------|------------------------|----------------|-------------------|------------------------|----------------|-------------------|
|                                   | <i>comparison</i>    | <i>means<br/>diff.</i> | <i>p</i>       | <i>p-adj. (q)</i> |
| <b>14:0</b>                       | AA unin. vs AA tumor | 0.19                   | 8.4E-01        | 7.0E-01           | 0.42                   | 6.3E-01        | 5.4E-01           | 5.80                   | <b>5.6E-05</b> | <b>9.8E-05</b>    | 0.25                   | 8.5E-01        | 8.3E-01           |
| <b>16:0</b>                       | AA unin. vs AA tumor | 1.24                   | 1.9E-01        | 3.5E-01           | 5.36                   | <b>4.1E-09</b> | <b>1.3E-08</b>    | 4.28                   | <b>2.6E-03</b> | <b>3.5E-03</b>    | 10.73                  | <b>2.5E-14</b> | <b>2.1E-13</b>    |
| <b>18:1</b>                       | AA unin. vs AA tumor | 0.01                   | 9.9E-01        | 7.3E-01           | 0.16                   | 8.5E-01        | 5.4E-01           | -0.12                  | 9.3E-01        | 4.9E-01           | 0.33                   | 8.0E-01        | 8.3E-01           |
| <b>18:0</b>                       | AA unin. vs AA tumor | 0.26                   | 7.8E-01        | 7.0E-01           | 0.22                   | 8.0E-01        | 5.4E-01           | -1.52                  | 2.8E-01        | 2.5E-01           | 0.20                   | 8.8E-01        | 8.3E-01           |
| <b>20:0</b>                       | AA unin. vs AA tumor | 0.68                   | 4.7E-01        | 6.9E-01           | 0.45                   | 6.0E-01        | 5.4E-01           | 0.80                   | 5.7E-01        | 3.3E-01           | 0.17                   | 9.0E-01        | 8.3E-01           |
| <b>22:0</b>                       | AA unin. vs AA tumor | 3.56                   | <b>2.0E-04</b> | <b>4.9E-04</b>    | 3.39                   | <b>1.3E-04</b> | <b>2.1E-04</b>    | 4.03                   | <b>4.6E-03</b> | <b>4.8E-03</b>    | 1.04                   | 4.2E-01        | 8.3E-01           |
| <b>24:1</b>                       | AA unin. vs AA tumor | 6.96                   | <b>4.4E-12</b> | <b>1.6E-11</b>    | 4.68                   | <b>2.1E-07</b> | <b>4.3E-07</b>    | 6.17                   | <b>1.9E-05</b> | <b>5.0E-05</b>    | 2.32                   | 7.4E-02        | 2.1E-01           |
| <b>24:0</b>                       | AA unin. vs AA tumor | 11.41                  | <b>1.0E-15</b> | <b>1.0E-15</b>    | 12.55                  | <b>1.0E-15</b> | <b>1.0E-15</b>    | 8.26                   | <b>2.0E-08</b> | <b>1.0E-07</b>    | 4.45                   | <b>7.2E-04</b> | <b>3.0E-03</b>    |
| <b>26:1</b>                       | AA unin. vs AA tumor | 0.30                   | 7.5E-01        | 7.0E-01           | 0.22                   | 8.0E-01        | 5.4E-01           | 0.89                   | 5.3E-01        | 3.3E-01           | 0.06                   | 9.6E-01        | 8.3E-01           |
| <b>26:0</b>                       | AA unin. vs AA tumor | 0.17                   | 8.6E-01        | 7.0E-01           | 0.29                   | 7.4E-01        | 5.4E-01           | 0.92                   | 5.1E-01        | 3.3E-01           | 0.02                   | 9.8E-01        | 8.3E-01           |

| EEC AA            |                      | sphingoid bases    |                |                   |
|-------------------|----------------------|--------------------|----------------|-------------------|
| <i>species</i>    | <i>comparison</i>    | <i>means diff.</i> | <i>p</i>       | <i>p-adj. (q)</i> |
| <b>d18:1 So</b>   | AA unin. vs AA tumor | 245.29             | <b>3.6E-04</b> | <b>1.4E-03</b>    |
| <b>d18:0 Sa</b>   | AA unin. vs AA tumor | 13.42              | <b>2.3E-05</b> | <b>6.8E-05</b>    |
| <b>d18:1 So1P</b> | AA unin. vs AA tumor | 0.83               | 7.9E-01        | 9.5E-01           |
| <b>d18:0 Sa1P</b> | AA unin. vs AA tumor | 0.18               | 9.5E-01        | 9.5E-01           |

**Supplemental Table S7.** Uncorrected (p) and FDR/BKY-adjusted (Q=0.05) p-values (q) for unin. versus tumor comparisons with EEC tissues from AA females. Means diff. values that are positive indicate that the corresponding lipid species is higher in the tumor than in the unin. tissue. The lower limit of p- and q-value calculations were set to 1.0E-15 (Prism), so no values are reported lower than this limit. Alterations considered significant ( $\alpha \leq 0.05$ ,  $q \leq 0.05$ ) are in bold text. Means differences (means diff.) were calculated following ANOVA analysis (Prism).

| <i>acyl<br/>chain-<br/>length</i> | COAD AA              | ceramide               |                |                   | monohexosylceramide    |                |                   | sphingomyelin          |                |                   | lactosylceramide       |                |                   |
|-----------------------------------|----------------------|------------------------|----------------|-------------------|------------------------|----------------|-------------------|------------------------|----------------|-------------------|------------------------|----------------|-------------------|
|                                   | <i>comparison</i>    | <i>means<br/>diff.</i> | <i>p</i>       | <i>p-adj. (q)</i> |
| <b>14:0</b>                       | AA unin. vs AA tumor | 0.23                   | 8.4E-01        | 8.4E-01           | 0.27                   | 7.3E-01        | 7.3E-01           | 3.32                   | <b>3.5E-02</b> | 8.2E-02           | 0.08                   | 9.6E-01        | 9.4E-01           |
| <b>16:0</b>                       | AA unin. vs AA tumor | 2.39                   | <b>3.3E-02</b> | 9.2E-02           | 5.17                   | <b>1.1E-10</b> | <b>3.9E-10</b>    | 5.57                   | <b>4.1E-04</b> | <b>3.9E-03</b>    | 18.08                  | <b>1.0E-15</b> | <b>1.0E-15</b>    |
| <b>18:1</b>                       | AA unin. vs AA tumor | 0.03                   | 9.8E-01        | 8.4E-01           | 0.13                   | 8.7E-01        | 7.3E-01           | -0.31                  | 8.4E-01        | 9.2E-01           | 0.06                   | 9.7E-01        | 9.4E-01           |
| <b>18:0</b>                       | AA unin. vs AA tumor | 0.03                   | 9.8E-01        | 8.4E-01           | 0.00                   | 1.0E+00        | 7.3E-01           | -3.93                  | <b>1.3E-02</b> | 5.9E-02           | 0.07                   | 9.7E-01        | 9.4E-01           |
| <b>20:0</b>                       | AA unin. vs AA tumor | 0.00                   | 1.0E+00        | 8.4E-01           | -0.01                  | 9.9E-01        | 7.3E-01           | -3.40                  | <b>3.1E-02</b> | <b>8.2E-02</b>    | 0.02                   | 9.9E-01        | 9.4E-01           |
| <b>22:0</b>                       | AA unin. vs AA tumor | 1.20                   | 2.8E-01        | 6.0E-01           | 0.90                   | 2.5E-01        | 4.7E-01           | -2.54                  | 1.1E-01        | 2.0E-01           | 0.84                   | 6.1E-01        | 9.4E-01           |
| <b>24:1</b>                       | AA unin. vs AA tumor | 9.06                   | <b>3.0E-15</b> | <b>2.8E-14</b>    | 2.21                   | <b>5.1E-03</b> | <b>1.3E-02</b>    | 0.58                   | 7.1E-01        | 9.2E-01           | 3.68                   | <b>2.5E-02</b> | 1.2E-01           |
| <b>24:0</b>                       | AA unin. vs AA tumor | 5.25                   | <b>3.4E-06</b> | <b>1.4E-05</b>    | 5.83                   | <b>4.1E-13</b> | <b>3.0E-12</b>    | 1.08                   | 4.9E-01        | 7.7E-01           | 2.52                   | 1.3E-01        | 4.0E-01           |
| <b>26:1</b>                       | AA unin. vs AA tumor | 0.35                   | 7.5E-01        | 8.4E-01           | 0.14                   | 8.5E-01        | 7.3E-01           | -0.09                  | 9.5E-01        | 9.2E-01           | 0.08                   | 9.6E-01        | 9.4E-01           |
| <b>26:0</b>                       | AA unin. vs AA tumor | 0.18                   | 8.7E-01        | 8.4E-01           | 0.15                   | 8.5E-01        | 7.3E-01           | -0.04                  | 9.8E-01        | 9.2E-01           | 0.02                   | 9.9E-01        | 9.4E-01           |

| COAD AA           |                      | sphingoid bases    |                |                   |
|-------------------|----------------------|--------------------|----------------|-------------------|
| <i>species</i>    | <i>comparison</i>    | <i>means diff.</i> | <i>p</i>       | <i>p-adj. (q)</i> |
| <b>d18:1 So</b>   | AA unin. vs AA tumor | 4.27               | <b>1.5E-02</b> | <b>1.6E-02</b>    |
| <b>d18:0 Sa</b>   | AA unin. vs AA tumor | 6.59               | <b>8.8E-04</b> | <b>1.9E-03</b>    |
| <b>d18:1 So1P</b> | AA unin. vs AA tumor | 0.04               | 9.8E-01        | 6.9E-01           |
| <b>d18:0 Sa1P</b> | AA unin. vs AA tumor | 0.16               | 9.3E-01        | 6.9E-01           |

**Supplemental Table S8.** Uncorrected (p) and FDR/BKY-adjusted (Q=0.05) p-values (q) for unin. versus tumor comparisons with COAD tissues from AA males. Means diff. values that are positive indicate that the corresponding lipid species is higher in the tumor than in the unin. tissue. The lower limit of p- and q-value calculations were set to 1.0E-15 (Prism), so no values are reported lower than this limit. Alterations considered significant ( $\alpha \leq 0.05$ ,  $q \leq 0.05$ ) are in bold text. Means differences (means diff.) were calculated following ANOVA analysis (Prism).



| <i>acyl<br/>chain-<br/>length</i> | HCC AA               | ceramide               |          |                   | monohexosylceramide    |                |                   | sphingomyelin          |          |                   | lactosylceramide       |                |                   |
|-----------------------------------|----------------------|------------------------|----------|-------------------|------------------------|----------------|-------------------|------------------------|----------|-------------------|------------------------|----------------|-------------------|
|                                   | <i>comparison</i>    | <i>means<br/>diff.</i> | <i>p</i> | <i>p-adj. (q)</i> | <i>means<br/>diff.</i> | <i>p</i>       | <i>p-adj. (q)</i> | <i>means<br/>diff.</i> | <i>p</i> | <i>p-adj. (q)</i> | <i>means<br/>diff.</i> | <i>p</i>       | <i>p-adj. (q)</i> |
| <b>14:0</b>                       | AA unin. vs AA tumor | 0.13                   | 9.8E-01  | 1.0E+00           | 0.01                   | 9.9E-01        | 9.4E-01           | -4.23                  | 3.9E-01  | 1.0E+00           | -0.16                  | 9.3E-01        | 9.4E-01           |
| <b>16:0</b>                       | AA unin. vs AA tumor | 0.73                   | 8.8E-01  | 1.0E+00           | -0.31                  | 7.6E-01        | 9.4E-01           | -1.49                  | 7.6E-01  | 1.0E+00           | -5.52                  | <b>1.8E-03</b> | <b>1.7E-02</b>    |
| <b>18:1</b>                       | AA unin. vs AA tumor | 0.08                   | 9.9E-01  | 1.0E+00           | -0.01                  | 9.9E-01        | 9.4E-01           | 0.06                   | 9.9E-01  | 1.0E+00           | -0.27                  | 8.8E-01        | 9.4E-01           |
| <b>18:0</b>                       | AA unin. vs AA tumor | -0.23                  | 9.6E-01  | 1.0E+00           | -0.02                  | 9.9E-01        | 9.4E-01           | -1.13                  | 8.2E-01  | 1.0E+00           | 0.07                   | 9.7E-01        | 9.4E-01           |
| <b>20:0</b>                       | AA unin. vs AA tumor | -0.53                  | 9.1E-01  | 1.0E+00           | -0.03                  | 9.8E-01        | 9.4E-01           | -3.51                  | 4.8E-01  | 1.0E+00           | -0.15                  | 9.3E-01        | 9.4E-01           |
| <b>22:0</b>                       | AA unin. vs AA tumor | 1.66                   | 7.2E-01  | 1.0E+00           | -0.77                  | 4.5E-01        | 9.4E-01           | -8.35                  | 9.2E-02  | 3.5E-01           | -2.67                  | 1.3E-01        | 4.0E-01           |
| <b>24:1</b>                       | AA unin. vs AA tumor | 2.01                   | 6.7E-01  | 1.0E+00           | -0.06                  | 9.5E-01        | 9.4E-01           | -8.15                  | 9.9E-02  | 3.5E-01           | -1.18                  | 5.0E-01        | 9.4E-01           |
| <b>24:0</b>                       | AA unin. vs AA tumor | 7.59                   | 1.1E-01  | 1.0E+00           | -3.00                  | <b>3.6E-03</b> | <b>3.4E-02</b>    | -8.34                  | 9.2E-02  | 3.5E-01           | -2.90                  | 9.8E-02        | 4.0E-01           |
| <b>26:1</b>                       | AA unin. vs AA tumor | 0.48                   | 9.2E-01  | 1.0E+00           | 0.05                   | 9.6E-01        | 9.4E-01           | -0.14                  | 9.8E-01  | 1.0E+00           | -0.02                  | 9.9E-01        | 9.4E-01           |
| <b>26:0</b>                       | AA unin. vs AA tumor | 0.04                   | 9.9E-01  | 1.0E+00           | -0.02                  | 9.9E-01        | 9.4E-01           | -0.53                  | 9.1E-01  | 1.0E+00           | -0.02                  | 9.9E-01        | 9.4E-01           |

| HCC AA            |                      | sphingoid bases    |                |                   |
|-------------------|----------------------|--------------------|----------------|-------------------|
| <i>species</i>    | <i>comparison</i>    | <i>means diff.</i> | <i>p</i>       | <i>p-adj. (q)</i> |
| <b>d18:1 So</b>   | AA unin. vs AA tumor | -10.25             | 5.9E-02        | 2.5E-01           |
| <b>d18:0 Sa</b>   | AA unin. vs AA tumor | -8.12              | <b>7.4E-03</b> | <b>1.5E-02</b>    |
| <b>d18:1 So1P</b> | AA unin. vs AA tumor | -0.06              | <b>2.4E-04</b> | <b>2.6E-04</b>    |
| <b>d18:0 Sa1P</b> | AA unin. vs AA tumor | 0.00               | 9.5E-01        | 1.0E+00           |

**Supplemental Table S9.** Uncorrected (p) and FDR/BKY-adjusted (Q=0.05) p-values (q) for unin. versus tumor comparisons with HCC tissues from AA males. Means diff. values that are positive indicate that the corresponding lipid species is higher in the tumor than in the unin. tissue. The lower limit of p- and q-value calculations were set to 1.0E-15 (Prism), so no values are reported lower than this limit. Alterations considered significant ( $\alpha \leq 0.05$ ,  $q \leq 0.05$ ) are in bold text. Means differences (means diff.) were calculated following ANOVA analysis (Prism).

| <i>acyl<br/>chain-<br/>length</i> | HNSCC AA             | ceramide               |                |                   | monohexosylceramide    |                |                   | sphingomyelin          |          |                   | lactosylceramide       |                |                   |
|-----------------------------------|----------------------|------------------------|----------------|-------------------|------------------------|----------------|-------------------|------------------------|----------|-------------------|------------------------|----------------|-------------------|
|                                   | <i>comparison</i>    | <i>means<br/>diff.</i> | <i>p</i>       | <i>p-adj. (q)</i> | <i>means<br/>diff.</i> | <i>p</i>       | <i>p-adj. (q)</i> | <i>means<br/>diff.</i> | <i>p</i> | <i>p-adj. (q)</i> | <i>means<br/>diff.</i> | <i>p</i>       | <i>p-adj. (q)</i> |
| <b>14:0</b>                       | AA unin. vs AA tumor | 1.13                   | 5.5E-01        | 3.2E-01           | 0.29                   | 9.2E-01        | 8.3E-01           | 7.85                   | 1.1E-01  | 3.5E-01           | 0.32                   | 9.4E-01        | 7.0E-01           |
| <b>16:0</b>                       | AA unin. vs AA tumor | 9.31                   | <b>1.7E-06</b> | <b>4.4E-06</b>    | 11.38                  | <b>9.2E-05</b> | <b>3.9E-04</b>    | -8.48                  | 8.6E-02  | 3.5E-01           | 47.46                  | <b>1.0E-15</b> | <b>1.0E-15</b>    |
| <b>18:1</b>                       | AA unin. vs AA tumor | 0.02                   | 9.9E-01        | 5.2E-01           | 0.03                   | 9.9E-01        | 8.3E-01           | -1.06                  | 8.3E-01  | 9.9E-01           | 0.27                   | 9.5E-01        | 7.0E-01           |
| <b>18:0</b>                       | AA unin. vs AA tumor | 1.28                   | 5.0E-01        | 3.2E-01           | 0.87                   | 7.6E-01        | 8.3E-01           | -7.43                  | 1.3E-01  | 3.5E-01           | 0.74                   | 8.6E-01        | 7.0E-01           |
| <b>20:0</b>                       | AA unin. vs AA tumor | 3.02                   | 1.1E-01        | 9.7E-02           | 1.54                   | 5.9E-01        | 8.3E-01           | 0.46                   | 9.3E-01  | 9.9E-01           | 0.37                   | 9.3E-01        | 7.0E-01           |
| <b>22:0</b>                       | AA unin. vs AA tumor | 4.57                   | <b>1.6E-02</b> | <b>1.7E-02</b>    | 1.90                   | 5.1E-01        | 8.3E-01           | 2.24                   | 6.5E-01  | 9.9E-01           | 5.36                   | 2.0E-01        | 3.6E-01           |
| <b>24:1</b>                       | AA unin. vs AA tumor | 7.16                   | <b>2.0E-04</b> | <b>2.6E-04</b>    | 5.99                   | <b>3.7E-02</b> | 1.0E-01           | 0.34                   | 9.4E-01  | 9.9E-01           | 23.03                  | <b>8.8E-08</b> | <b>3.2E-07</b>    |
| <b>24:0</b>                       | AA unin. vs AA tumor | 14.43                  | <b>7.6E-13</b> | <b>4.0E-12</b>    | 12.35                  | <b>2.3E-05</b> | <b>2.0E-04</b>    | 7.45                   | 1.3E-01  | 3.5E-01           | 14.47                  | <b>6.0E-04</b> | <b>1.5E-03</b>    |
| <b>26:1</b>                       | AA unin. vs AA tumor | 1.36                   | 4.7E-01        | 3.2E-01           | 5.19                   | 7.0E-02        | 1.5E-01           | 6.20                   | 2.1E-01  | 4.4E-01           | 1.11                   | 7.9E-01        | 7.0E-01           |
| <b>26:0</b>                       | AA unin. vs AA tumor | 7.55                   | <b>8.9E-05</b> | <b>1.6E-04</b>    | 0.63                   | 8.2E-01        | 8.3E-01           | 1.52                   | 7.6E-01  | 9.9E-01           | 1.03                   | 8.0E-01        | 7.0E-01           |

| HNSCC AA          |                      | sphingoid bases    |          |                   |
|-------------------|----------------------|--------------------|----------|-------------------|
| <i>species</i>    | <i>comparison</i>    | <i>means diff.</i> | <i>p</i> | <i>p-adj. (q)</i> |
| <b>d18:1 So</b>   | AA unin. vs AA tumor | -5.75              | 1.9E-01  | 7.9E-01           |
| <b>d18:0 Sa</b>   | AA unin. vs AA tumor | -3.44              | 3.1E-01  | 9.7E-01           |
| <b>d18:1 So1P</b> | AA unin. vs AA tumor | -0.13              | 2.1E-01  | 4.5E-01           |
| <b>d18:0 Sa1P</b> | AA unin. vs AA tumor | -0.02              | 8.7E-01  | 9.1E-01           |

**Supplemental Table S10.** Uncorrected (p) and FDR/BKY-adjusted (Q=0.05) p-values (q) for unin. versus tumor comparisons with HNSCC tissues from AA males. Means diff. values that are positive indicate that the corresponding lipid species is higher in the tumor than in the unin. tissue. The lower limit of p- and q-value calculations were set to 1.0E-15 (Prism), so no values are reported lower than this limit. Alterations considered significant ( $\alpha \leq 0.05$ ,  $q \leq 0.05$ ) are in bold text. Means differences (means diff.) were calculated following ANOVA analysis (Prism).

| <i>acyl<br/>chain-<br/>length</i> | LUAD NHW               | ceramide               |                |                   | monohexosylceramide    |                |                   | sphingomyelin          |          |                   | lactosylceramide       |                |                   |
|-----------------------------------|------------------------|------------------------|----------------|-------------------|------------------------|----------------|-------------------|------------------------|----------|-------------------|------------------------|----------------|-------------------|
|                                   | <i>comparison</i>      | <i>means<br/>diff.</i> | <i>p</i>       | <i>p-adj. (q)</i> | <i>means<br/>diff.</i> | <i>p</i>       | <i>p-adj. (q)</i> | <i>means<br/>diff.</i> | <i>p</i> | <i>p-adj. (q)</i> | <i>means<br/>diff.</i> | <i>p</i>       | <i>p-adj. (q)</i> |
| <b>14:0</b>                       | NHW unin. vs NHW tumor | 0.13                   | 9.0E-01        | 7.1E-01           | 0.05                   | 9.5E-01        | 7.2E-01           | 0.08                   | 9.8E-01  | 1.0E+00           | 0.08                   | 9.4E-01        | 1.0E+00           |
| <b>16:0</b>                       | NHW unin. vs NHW tumor | 2.72                   | <b>1.3E-02</b> | <b>3.3E-02</b>    | 2.83                   | <b>1.7E-04</b> | <b>4.1E-04</b>    | 5.32                   | 6.6E-02  | 7.0E-01           | 2.20                   | <b>4.4E-02</b> | 4.6E-01           |
| <b>18:1</b>                       | NHW unin. vs NHW tumor | 0.05                   | 9.6E-01        | 7.1E-01           | 0.08                   | 9.1E-01        | 7.2E-01           | 0.13                   | 9.6E-01  | 1.0E+00           | 0.07                   | 9.5E-01        | 1.0E+00           |
| <b>18:0</b>                       | NHW unin. vs NHW tumor | 0.21                   | 8.5E-01        | 7.1E-01           | 0.06                   | 9.3E-01        | 7.2E-01           | 1.69                   | 5.6E-01  | 1.0E+00           | 0.18                   | 8.7E-01        | 1.0E+00           |
| <b>20:0</b>                       | NHW unin. vs NHW tumor | 0.37                   | 7.3E-01        | 7.1E-01           | -0.02                  | 9.8E-01        | 7.2E-01           | 1.09                   | 7.1E-01  | 1.0E+00           | 0.06                   | 9.6E-01        | 1.0E+00           |
| <b>22:0</b>                       | NHW unin. vs NHW tumor | 1.55                   | 1.6E-01        | 2.9E-01           | 0.65                   | 3.8E-01        | 7.1E-01           | 2.97                   | 3.0E-01  | 1.0E+00           | 0.54                   | 6.2E-01        | 1.0E+00           |
| <b>24:1</b>                       | NHW unin. vs NHW tumor | 8.04                   | <b>9.8E-13</b> | <b>7.2E-12</b>    | 6.04                   | <b>5.0E-15</b> | <b>3.9E-14</b>    | 3.39                   | 2.4E-01  | 1.0E+00           | 1.61                   | 1.4E-01        | 5.3E-01           |
| <b>24:0</b>                       | NHW unin. vs NHW tumor | 4.42                   | <b>6.3E-05</b> | <b>2.3E-04</b>    | 3.07                   | <b>4.6E-05</b> | <b>1.7E-04</b>    | 0.70                   | 8.1E-01  | 1.0E+00           | 1.57                   | 1.5E-01        | 5.3E-01           |
| <b>26:1</b>                       | NHW unin. vs NHW tumor | 0.38                   | 7.3E-01        | 7.1E-01           | 0.22                   | 7.7E-01        | 7.2E-01           | -0.31                  | 9.1E-01  | 1.0E+00           | 0.07                   | 9.5E-01        | 1.0E+00           |
| <b>26:0</b>                       | NHW unin. vs NHW tumor | 0.19                   | 8.6E-01        | 7.1E-01           | 0.07                   | 9.3E-01        | 7.2E-01           | -0.24                  | 9.3E-01  | 1.0E+00           | 0.02                   | 9.8E-01        | 1.0E+00           |

| LUAD NHW          |                        | sphingoid bases    |          |                   |
|-------------------|------------------------|--------------------|----------|-------------------|
| <i>species</i>    | <i>comparison</i>      | <i>means diff.</i> | <i>p</i> | <i>p-adj. (q)</i> |
| <b>d18:1 So</b>   | NHW unin. vs NHW tumor | 0.84               | 4.3E-01  | 1.0E+00           |
| <b>d18:0 Sa</b>   | NHW unin. vs NHW tumor | 0.19               | 5.9E-01  | 1.0E+00           |
| <b>d18:1 So1P</b> | NHW unin. vs NHW tumor | 0.03               | 9.4E-01  | 1.0E+00           |
| <b>d18:0 Sa1P</b> | NHW unin. vs NHW tumor | 0.01               | 9.8E-01  | 1.0E+00           |

**Supplemental Table S11.** Uncorrected (p) and FDR/BKY-adjusted (Q=0.05) p-values (q) for comparisons of unin. vs tumor tissues from NHW males with LUAD. Means diff. values that are positive indicate that the corresponding lipid species is higher in the tumor than in the unin. tissue. The lower limit of p- and q-value calculations were set to 1.0E-15 (Prism), so no values are reported lower than this limit. Alterations considered significant ( $\alpha \leq 0.05$ ,  $q \leq 0.05$ ) are in bold text. Means differences (means diff.) were calculated following ANOVA analysis (Prism).

| <i>acyl<br/>chain-<br/>length</i> | EEC NHW                | ceramide               |                |                   | monohexosylceramide    |                |                   | sphingomyelin          |                |                   | lactosylceramide       |                |                   |
|-----------------------------------|------------------------|------------------------|----------------|-------------------|------------------------|----------------|-------------------|------------------------|----------------|-------------------|------------------------|----------------|-------------------|
|                                   | <i>comparison</i>      | <i>means<br/>diff.</i> | <i>p</i>       | <i>p-adj. (q)</i> |
| <b>14:0</b>                       | NHW unin. vs NHW tumor | 0.25                   | 7.8E-01        | 6.1E-01           | 0.47                   | 7.4E-01        | 5.5E-01           | 3.10                   | 8.1E-02        | 4.5E-01           | 0.10                   | 9.4E-01        | 1.0E+00           |
| <b>16:0</b>                       | NHW unin. vs NHW tumor | 2.04                   | <b>2.2E-02</b> | <b>3.9E-02</b>    | 9.29                   | <b>3.5E-10</b> | <b>1.1E-09</b>    | 2.73                   | 1.3E-01        | 5.8E-01           | 12.70                  | <b>1.0E-15</b> | <b>1.0E-15</b>    |
| <b>18:1</b>                       | NHW unin. vs NHW tumor | 0.03                   | 9.8E-01        | 6.9E-01           | 0.22                   | 8.7E-01        | 5.5E-01           | -0.26                  | 8.8E-01        | 9.4E-01           | 0.30                   | 8.1E-01        | 1.0E+00           |
| <b>18:0</b>                       | NHW unin. vs NHW tumor | 0.38                   | 6.7E-01        | 5.9E-01           | 0.22                   | 8.8E-01        | 5.5E-01           | -1.72                  | 3.3E-01        | 8.3E-01           | 0.00                   | 1.0E+00        | 1.0E+00           |
| <b>20:0</b>                       | NHW unin. vs NHW tumor | 0.75                   | 4.0E-01        | 5.5E-01           | 0.26                   | 8.5E-01        | 5.5E-01           | -0.54                  | 7.6E-01        | 9.4E-01           | 0.09                   | 9.4E-01        | 1.0E+00           |
| <b>22:0</b>                       | NHW unin. vs NHW tumor | 3.81                   | <b>2.4E-05</b> | <b>5.6E-05</b>    | 3.69                   | <b>9.5E-03</b> | <b>1.5E-02</b>    | 3.82                   | <b>3.2E-02</b> | 2.3E-01           | 0.72                   | 5.5E-01        | 1.0E+00           |
| <b>24:1</b>                       | NHW unin. vs NHW tumor | 9.80                   | <b>1.0E-15</b> | <b>1.0E-15</b>    | 4.51                   | <b>1.6E-03</b> | <b>3.4E-03</b>    | 8.56                   | <b>2.6E-06</b> | <b>2.3E-05</b>    | 2.75                   | <b>2.3E-02</b> | 1.7E-01           |
| <b>24:0</b>                       | NHW unin. vs NHW tumor | 10.57                  | <b>1.0E-15</b> | <b>1.0E-15</b>    | 12.91                  | <b>1.0E-15</b> | <b>1.0E-15</b>    | 10.77                  | <b>5.5E-09</b> | <b>5.5E-08</b>    | 2.92                   | <b>1.6E-02</b> | 1.4E-01           |
| <b>26:1</b>                       | NHW unin. vs NHW tumor | 0.54                   | 5.4E-01        | 5.5E-01           | 0.34                   | 8.1E-01        | 5.5E-01           | 1.29                   | 4.7E-01        | 8.5E-01           | 0.07                   | 9.5E-01        | 1.0E+00           |
| <b>26:0</b>                       | NHW unin. vs NHW tumor | 0.56                   | 5.2E-01        | 5.5E-01           | 0.78                   | 5.8E-01        | 5.5E-01           | 1.84                   | 3.0E-01        | 8.3E-01           | 0.03                   | 9.8E-01        | 1.0E+00           |

| EEC NHW           |                        | sphingoid bases    |                |                   |
|-------------------|------------------------|--------------------|----------------|-------------------|
| <i>species</i>    | <i>comparison</i>      | <i>means diff.</i> | <i>p</i>       | <i>p-adj. (q)</i> |
| <b>d18:1 So</b>   | NHW unin. vs NHW tumor | 104.62             | <b>6.1E-09</b> | <b>2.5E-08</b>    |
| <b>d18:0 Sa</b>   | NHW unin. vs NHW tumor | 15.13              | <b>1.4E-04</b> | <b>4.1E-04</b>    |
| <b>d18:1 So1P</b> | NHW unin. vs NHW tumor | 1.80               | 6.4E-01        | 8.7E-01           |
| <b>d18:0 Sa1P</b> | NHW unin. vs NHW tumor | 1.46               | 6.8E-01        | 8.7E-01           |

**Supplemental Table S12.** Uncorrected (p) and FDR/BKY-adjusted (Q=0.05) p-values (q) for comparisons of unin. vs tumor tissues from NHW females with EEC. Means diff. values that are positive indicate that the corresponding lipid species is higher in the tumor than in the unin. tissue. The lower limit of p- and q-value calculations were set to 1.0E-15 (Prism), so no values are reported lower than this limit. Alterations considered significant ( $\alpha \leq 0.05$ ,  $q \leq 0.05$ ) are in bold text. Means differences (means diff.) were calculated following ANOVA analysis (Prism).

| <i>acyl<br/>chain-<br/>length</i> | COAD NHW               | ceramide               |                |                   | monohexosylceramide    |                |                   | sphingomyelin          |                |                   | lactosylceramide       |                |                   |
|-----------------------------------|------------------------|------------------------|----------------|-------------------|------------------------|----------------|-------------------|------------------------|----------------|-------------------|------------------------|----------------|-------------------|
|                                   | <i>comparison</i>      | <i>means<br/>diff.</i> | <i>p</i>       | <i>p-adj. (q)</i> |
| <b>14:0</b>                       | NHW unin. vs NHW tumor | 0.17                   | 8.1E-01        | 7.3E-01           | 0.11                   | 8.9E-01        | 7.3E-01           | 2.12                   | 1.4E-01        | 4.8E-01           | 0.12                   | 9.3E-01        | 9.4E-01           |
| <b>16:0</b>                       | NHW unin. vs NHW tumor | 2.07                   | <b>4.1E-03</b> | <b>1.0E-02</b>    | 4.47                   | <b>2.3E-08</b> | <b>8.5E-08</b>    | 1.25                   | 3.8E-01        | 7.4E-01           | 13.15                  | <b>1.0E-15</b> | <b>1.0E-15</b>    |
| <b>18:1</b>                       | NHW unin. vs NHW tumor | 0.00                   | 1.0E+00        | 7.3E-01           | 0.05                   | 9.5E-01        | 7.3E-01           | -0.45                  | 7.5E-01        | 9.7E-01           | -0.05                  | 9.7E-01        | 9.4E-01           |
| <b>18:0</b>                       | NHW unin. vs NHW tumor | -0.06                  | 9.4E-01        | 7.3E-01           | -0.02                  | 9.8E-01        | 7.3E-01           | -3.86                  | <b>6.9E-03</b> | 7.2E-02           | 0.04                   | 9.8E-01        | 9.4E-01           |
| <b>20:0</b>                       | NHW unin. vs NHW tumor | -0.02                  | 9.8E-01        | 7.3E-01           | 0.01                   | 9.9E-01        | 7.3E-01           | -3.38                  | <b>1.8E-02</b> | 9.3E-02           | 0.01                   | 1.0E+00        | 9.4E-01           |
| <b>22:0</b>                       | NHW unin. vs NHW tumor | 1.13                   | 1.2E-01        | 2.2E-01           | 1.52                   | 5.4E-02        | 1.0E-01           | -1.22                  | 3.9E-01        | 7.4E-01           | 0.74                   | 5.6E-01        | 9.4E-01           |
| <b>24:1</b>                       | NHW unin. vs NHW tumor | 4.90                   | <b>3.1E-11</b> | <b>2.2E-10</b>    | 2.33                   | <b>3.2E-03</b> | <b>7.8E-03</b>    | 1.15                   | 4.2E-01        | 7.4E-01           | 2.72                   | <b>3.2E-02</b> | 1.5E-01           |
| <b>24:0</b>                       | NHW unin. vs NHW tumor | 3.61                   | <b>7.4E-07</b> | <b>2.7E-06</b>    | 6.52                   | <b>1.0E-15</b> | <b>9.0E-15</b>    | 0.60                   | 6.7E-01        | 9.7E-01           | 2.13                   | 9.2E-02        | 2.9E-01           |
| <b>26:1</b>                       | NHW unin. vs NHW tumor | 0.11                   | 8.7E-01        | 7.3E-01           | 0.13                   | 8.7E-01        | 7.3E-01           | -0.15                  | 9.2E-01        | 9.7E-01           | 0.08                   | 9.5E-01        | 9.4E-01           |
| <b>26:0</b>                       | NHW unin. vs NHW tumor | 0.20                   | 7.9E-01        | 7.3E-01           | 0.31                   | 6.9E-01        | 7.3E-01           | 0.13                   | 9.2E-01        | 9.7E-01           | 0.00                   | 1.0E+00        | 9.4E-01           |

| COAD NHW          |                        | sphingoid bases    |                |                   |
|-------------------|------------------------|--------------------|----------------|-------------------|
| <i>species</i>    | <i>comparison</i>      | <i>means diff.</i> | <i>p</i>       | <i>p-adj. (q)</i> |
| <b>d18:1 So</b>   | NHW unin. vs NHW tumor | 5.34               | <b>1.1E-02</b> | <b>1.2E-02</b>    |
| <b>d18:0 Sa</b>   | NHW unin. vs NHW tumor | 7.40               | <b>1.6E-03</b> | <b>3.3E-03</b>    |
| <b>d18:1 So1P</b> | NHW unin. vs NHW tumor | 0.02               | 9.9E-01        | 7.0E-01           |
| <b>d18:0 Sa1P</b> | NHW unin. vs NHW tumor | -0.01              | 1.0E+00        | 7.0E-01           |

**Supplemental Table S13.** Uncorrected (p) and FDR/BKY-adjusted (Q=5%) p-values (q) for comparisons of unin. vs tumor tissues from NHW males with COAD. Means diff. values that are positive indicate that the corresponding lipid species is higher in the tumor than in the unin. tissue. The lower limit of p- and q-value calculations were set to 1.0E-15 (Prism), so no values are reported lower than this limit. Alterations considered significant ( $\alpha \leq 0.05$ ,  $q \leq 0.05$ ) are in bold text. Means differences (means diff.) were calculated following ANOVA analysis (Prism).

| <i>acyl<br/>chain-<br/>length</i> | HCC NHW                | ceramide               |                |                   | monohexosylceramide    |                |                   | sphingomyelin          |          |                   | lactosylceramide       |          |                   |
|-----------------------------------|------------------------|------------------------|----------------|-------------------|------------------------|----------------|-------------------|------------------------|----------|-------------------|------------------------|----------|-------------------|
|                                   | <i>comparison</i>      | <i>means<br/>diff.</i> | <i>p</i>       | <i>p-adj. (q)</i> | <i>means<br/>diff.</i> | <i>p</i>       | <i>p-adj. (q)</i> | <i>means<br/>diff.</i> | <i>p</i> | <i>p-adj. (q)</i> | <i>means<br/>diff.</i> | <i>p</i> | <i>p-adj. (q)</i> |
| <b>14:0</b>                       | NHW unin. vs NHW tumor | 0.14                   | 9.5E-01        | 1.0E+00           | 0.01                   | 9.9E-01        | 8.4E-01           | 1.83                   | 2.6E-01  | 6.8E-01           | 0.00                   | 1.0E+00  | 1.0E+00           |
| <b>16:0</b>                       | NHW unin. vs NHW tumor | 1.84                   | 4.3E-01        | 1.0E+00           | 0.44                   | 7.3E-01        | 8.4E-01           | 0.53                   | 7.4E-01  | 1.0E+00           | 0.09                   | 9.5E-01  | 1.0E+00           |
| <b>18:1</b>                       | NHW unin. vs NHW tumor | 0.87                   | 7.1E-01        | 1.0E+00           | 0.02                   | 9.9E-01        | 8.4E-01           | 0.18                   | 9.1E-01  | 1.0E+00           | 0.38                   | 7.9E-01  | 1.0E+00           |
| <b>18:0</b>                       | NHW unin. vs NHW tumor | 0.12                   | 9.6E-01        | 1.0E+00           | -0.01                  | 9.9E-01        | 8.4E-01           | 0.06                   | 9.7E-01  | 1.0E+00           | 0.04                   | 9.7E-01  | 1.0E+00           |
| <b>20:0</b>                       | NHW unin. vs NHW tumor | -0.44                  | 8.5E-01        | 1.0E+00           | -0.06                  | 9.6E-01        | 8.4E-01           | -2.49                  | 1.2E-01  | 6.8E-01           | -0.06                  | 9.6E-01  | 1.0E+00           |
| <b>22:0</b>                       | NHW unin. vs NHW tumor | -2.05                  | 3.8E-01        | 1.0E+00           | -3.87                  | <b>3.1E-03</b> | <b>1.3E-02</b>    | -1.09                  | 5.0E-01  | 1.0E+00           | -2.58                  | 6.6E-02  | 7.0E-01           |
| <b>24:1</b>                       | NHW unin. vs NHW tumor | 6.57                   | <b>5.6E-03</b> | 5.9E-02           | 0.08                   | 9.5E-01        | 8.4E-01           | 2.16                   | 1.8E-01  | 6.8E-01           | -0.88                  | 5.3E-01  | 1.0E+00           |
| <b>24:0</b>                       | NHW unin. vs NHW tumor | -5.72                  | <b>1.6E-02</b> | <b>8.3E-02</b>    | -4.57                  | <b>5.0E-04</b> | <b>4.2E-03</b>    | 1.84                   | 2.5E-01  | 6.8E-01           | -1.13                  | 4.2E-01  | 1.0E+00           |
| <b>26:1</b>                       | NHW unin. vs NHW tumor | 0.28                   | 9.1E-01        | 1.0E+00           | 0.07                   | 9.6E-01        | 8.4E-01           | 0.34                   | 8.3E-01  | 1.0E+00           | 0.00                   | 1.0E+00  | 1.0E+00           |
| <b>26:0</b>                       | NHW unin. vs NHW tumor | 0.16                   | 9.5E-01        | 1.0E+00           | 0.10                   | 9.4E-01        | 8.4E-01           | -0.37                  | 8.2E-01  | 1.0E+00           | 0.00                   | 1.0E+00  | 1.0E+00           |

| HCC NHW           |                        | sphingoid bases    |                |                   |
|-------------------|------------------------|--------------------|----------------|-------------------|
| <i>species</i>    | <i>comparison</i>      | <i>means diff.</i> | <i>p</i>       | <i>p-adj. (q)</i> |
| <b>d18:1 So</b>   | NHW unin. vs NHW tumor | -7.29              | <b>4.5E-02</b> | 1.9E-01           |
| <b>d18:0 Sa</b>   | NHW unin. vs NHW tumor | -3.09              | 7.5E-02        | 2.4E-01           |
| <b>d18:1 So1P</b> | NHW unin. vs NHW tumor | -0.14              | 9.3E-02        | 1.9E-01           |
| <b>d18:0 Sa1P</b> | NHW unin. vs NHW tumor | 0.00               | 1.0E+00        | 1.0E+00           |

**Supplemental Table S14.** Uncorrected (p) and FDR/BKY-adjusted (Q=0.05) p-values (q) for comparisons of unin. vs tumor tissues from NHW males with HCC. Means difference (means diff.) values that are positive indicate that the corresponding lipid species is higher in the tumor than in the unin. tissue. The lower limit of p- and q-value calculations were set to 1.0E-15 (Prism), so no values are reported lower than this limit. Alterations considered significant ( $\alpha \leq 0.05$ ,  $q \leq 0.05$ ) are in bold text. Means differences were calculated following ANOVA analysis (Prism).

| <i>acyl<br/>chain-<br/>length</i> | HNSCC NHW              | ceramide               |                |                   | monohexosylceramide    |          |                   | sphingomyelin          |          |                   | lactosylceramide       |                |                   |
|-----------------------------------|------------------------|------------------------|----------------|-------------------|------------------------|----------|-------------------|------------------------|----------|-------------------|------------------------|----------------|-------------------|
|                                   | <i>comparison</i>      | <i>means<br/>diff.</i> | <i>p</i>       | <i>p-adj. (q)</i> | <i>means<br/>diff.</i> | <i>p</i> | <i>p-adj. (q)</i> | <i>means<br/>diff.</i> | <i>p</i> | <i>p-adj. (q)</i> | <i>means<br/>diff.</i> | <i>p</i>       | <i>p-adj. (q)</i> |
| <b>14:0</b>                       | NHW unin. vs NHW tumor | 0.41                   | 7.5E-01        | 6.1E-01           | 0.01                   | 1.0E+00  | 1.0E+00           | 2.79                   | 5.1E-01  | 8.2E-01           | 0.32                   | 9.4E-01        | 7.3E-01           |
| <b>16:0</b>                       | NHW unin. vs NHW tumor | 6.01                   | <b>4.7E-06</b> | <b>1.6E-05</b>    | 0.15                   | 9.4E-01  | 1.0E+00           | 1.57                   | 7.1E-01  | 8.2E-01           | 29.17                  | <b>1.8E-09</b> | <b>1.3E-08</b>    |
| <b>18:1</b>                       | NHW unin. vs NHW tumor | 0.12                   | 9.2E-01        | 6.8E-01           | 0.00                   | 1.0E+00  | 1.0E+00           | -2.45                  | 5.6E-01  | 8.2E-01           | 0.12                   | 9.8E-01        | 7.3E-01           |
| <b>18:0</b>                       | NHW unin. vs NHW tumor | 0.50                   | 7.0E-01        | 6.1E-01           | 0.15                   | 9.3E-01  | 1.0E+00           | -4.86                  | 2.5E-01  | 8.2E-01           | 0.25                   | 9.6E-01        | 7.3E-01           |
| <b>20:0</b>                       | NHW unin. vs NHW tumor | 1.05                   | 4.1E-01        | 5.1E-01           | 0.11                   | 9.5E-01  | 1.0E+00           | -3.15                  | 4.5E-01  | 8.2E-01           | 0.04                   | 9.9E-01        | 7.3E-01           |
| <b>22:0</b>                       | NHW unin. vs NHW tumor | 2.43                   | 5.9E-02        | 8.6E-02           | -3.50                  | 6.0E-02  | 6.3E-01           | -1.18                  | 7.8E-01  | 8.2E-01           | 3.95                   | 4.0E-01        | 7.3E-01           |
| <b>24:1</b>                       | NHW unin. vs NHW tumor | 2.92                   | <b>2.3E-02</b> | <b>4.3E-02</b>    | 0.68                   | 7.1E-01  | 1.0E+00           | 1.36                   | 7.5E-01  | 8.2E-01           | 22.64                  | <b>2.1E-06</b> | <b>7.8E-06</b>    |
| <b>24:0</b>                       | NHW unin. vs NHW tumor | 8.27                   | <b>6.8E-10</b> | <b>5.0E-09</b>    | 0.36                   | 8.5E-01  | 1.0E+00           | 2.53                   | 5.5E-01  | 8.2E-01           | 12.42                  | <b>8.1E-03</b> | <b>2.0E-02</b>    |
| <b>26:1</b>                       | NHW unin. vs NHW tumor | 0.65                   | 6.1E-01        | 6.1E-01           | 0.94                   | 6.1E-01  | 1.0E+00           | 6.36                   | 1.3E-01  | 8.2E-01           | 0.50                   | 9.1E-01        | 7.3E-01           |
| <b>26:0</b>                       | NHW unin. vs NHW tumor | 5.92                   | <b>6.5E-06</b> | <b>1.6E-05</b>    | 0.84                   | 6.5E-01  | 1.0E+00           | 1.23                   | 7.7E-01  | 8.2E-01           | -0.64                  | 8.9E-01        | 7.3E-01           |

| HNSCC NHW         |                        | sphingoid bases    |          |                   |
|-------------------|------------------------|--------------------|----------|-------------------|
| <i>species</i>    | <i>comparison</i>      | <i>means diff.</i> | <i>p</i> | <i>p-adj. (q)</i> |
| <b>d18:1 So</b>   | NHW unin. vs NHW tumor | -15.74             | 1.2E-01  | 5.1E-01           |
| <b>d18:0 Sa</b>   | NHW unin. vs NHW tumor | 0.90               | 8.2E-01  | 1.0E+00           |
| <b>d18:1 So1P</b> | NHW unin. vs NHW tumor | -0.85              | 2.0E-01  | 4.1E-01           |
| <b>d18:0 Sa1P</b> | NHW unin. vs NHW tumor | 0.03               | 9.7E-01  | 1.0E+00           |

**Supplemental Table S15.** Uncorrected (p) and FDR/BKY-adjusted (Q=0.05) p-values (q) for comparisons of unin. vs tumor tissues from NHW males with HNSCC. Means differences (means diff.) values that are positive indicate that the corresponding lipid species is higher in the tumor than in the unin. tissue. The lower limit of p- and q-value calculations were set to 1.0E-15 (Prism), so no values are reported lower than this limit. Alterations considered significant ( $\alpha \leq 0.05$ ,  $q \leq 0.05$ ) are in bold text. Means differences were calculated following ANOVA analysis (Prism).

| acyl<br>chain-<br>length | LUAD                   | ceramide       |                |                | monohexosylceramide |         |               | sphingomyelin  |                |               | lactosylceramide |                |                |
|--------------------------|------------------------|----------------|----------------|----------------|---------------------|---------|---------------|----------------|----------------|---------------|------------------|----------------|----------------|
|                          | comparison             | means<br>diff. | p              | p-adj.<br>(q)  | means<br>diff.      | p       | p-adj.<br>(q) | means<br>diff. | p              | p-adj.<br>(q) | means<br>diff.   | p              | p-adj.<br>(q)  |
| 14:0                     | AA unin. vs. NHW unin. | -0.02          | 9.9E-01        | 1.0E+00        | 0.00                | 1.0E+00 | 1.0E+00       | 1.74           | 7.2E-01        | 1.0E+00       | -0.02            | 9.8E-01        | 1.0E+00        |
|                          | AA tumor vs. NHW tumor | -0.09          | 9.4E-01        | 1.0E+00        | 0.01                | 9.9E-01 | 1.0E+00       | 1.35           | 7.7E-01        | 1.0E+00       | -0.11            | 9.2E-01        | 1.0E+00        |
| 16:0                     | AA unin. vs. NHW unin. | 0.05           | 9.7E-01        | 8.4E-01        | -0.63               | 5.0E-01 | 3.5E-01       | 7.12           | 1.5E-01        | 4.8E-01       | -3.17            | <b>9.7E-03</b> | <b>1.0E-02</b> |
|                          | AA tumor vs. NHW tumor | -1.68          | 1.5E-01        | 2.6E-01        | -1.16               | 1.8E-01 | 1.5E-01       | 0.32           | 9.4E-01        | 9.9E-01       | -2.65            | <b>2.0E-02</b> | <b>1.4E-02</b> |
| 18:1                     | AA unin. vs. NHW unin. | 0.07           | 9.5E-01        | 1.0E+00        | -0.03               | 9.8E-01 | 1.0E+00       | 4.17           | 3.9E-01        | 6.3E-01       | 0.00             | 1.0E+00        | 1.0E+00        |
|                          | AA tumor vs. NHW tumor | -0.02          | 9.9E-01        | 1.0E+00        | -0.08               | 9.2E-01 | 1.0E+00       | 4.20           | 3.6E-01        | 6.3E-01       | -0.04            | 9.7E-01        | 1.0E+00        |
| 18:0                     | AA unin. vs. NHW unin. | -0.34          | 7.8E-01        | 1.0E+00        | -0.01               | 9.9E-01 | 1.0E+00       | 10.79          | <b>2.8E-02</b> | 1.1E-01       | -0.01            | 9.9E-01        | 1.0E+00        |
|                          | AA tumor vs. NHW tumor | -0.55          | 6.3E-01        | 1.0E+00        | -0.10               | 9.1E-01 | 1.0E+00       | 8.10           | 7.6E-02        | 1.2E-01       | -0.12            | 9.2E-01        | 1.0E+00        |
| 20:0                     | AA unin. vs. NHW unin. | 0.03           | 9.8E-01        | 1.0E+00        | -0.09               | 9.3E-01 | 1.0E+00       | 4.98           | 3.1E-01        | 6.2E-01       | -0.02            | 9.8E-01        | 1.0E+00        |
|                          | AA tumor vs. NHW tumor | -0.22          | 8.5E-01        | 1.0E+00        | -0.07               | 9.4E-01 | 1.0E+00       | 7.61           | 9.6E-02        | 3.0E-01       | -0.08            | 9.4E-01        | 1.0E+00        |
| 22:0                     | AA unin. vs. NHW unin. | -0.41          | 7.4E-01        | 7.8E-01        | -0.55               | 5.6E-01 | 7.4E-01       | 11.18          | <b>2.3E-02</b> | 1.4E-01       | -0.40            | 7.4E-01        | 9.3E-01        |
|                          | AA tumor vs. NHW tumor | -0.84          | 4.7E-01        | 6.9E-01        | -0.17               | 8.5E-01 | 8.9E-01       | 3.93           | 3.9E-01        | 4.8E-01       | -0.71            | 5.3E-01        | 9.3E-01        |
| 24:1                     | AA unin. vs. NHW unin. | -0.02          | 9.9E-01        | 1.7E-01        | -0.17               | 8.5E-01 | 3.0E-01       | 6.72           | 1.7E-01        | 5.4E-01       | -1.50            | 2.2E-01        | 3.5E-01        |
|                          | AA tumor vs. NHW tumor | -3.07          | <b>8.2E-03</b> | <b>1.7E-03</b> | 0.21                | 8.1E-01 | 3.0E-01       | 4.25           | 3.5E-01        | 6.1E-01       | -2.25            | <b>4.8E-02</b> | 1.5E-01        |
| 24:0                     | AA unin. vs. NHW unin. | 0.66           | 5.9E-01        | 3.1E-01        | -0.60               | 5.2E-01 | 2.2E-01       | 4.52           | 3.6E-01        | 6.7E-01       | -0.92            | 4.5E-01        | 7.1E-01        |
|                          | AA tumor vs. NHW tumor | -1.67          | 1.5E-01        | 9.5E-02        | -0.05               | 9.6E-01 | 3.4E-01       | 4.10           | 3.7E-01        | 6.7E-01       | -1.91            | 9.3E-02        | 2.4E-01        |
| 26:1                     | AA unin. vs. NHW unin. | 0.15           | 9.0E-01        | 9.8E-01        | -0.01               | 9.9E-01 | 1.0E+00       | 1.86           | 7.0E-01        | 9.9E-01       | -0.01            | 9.9E-01        | 1.0E+00        |
|                          | AA tumor vs. NHW tumor | -0.11          | 9.2E-01        | 9.8E-01        | 0.06                | 9.5E-01 | 1.0E+00       | 1.32           | 7.7E-01        | 9.9E-01       | -0.06            | 9.6E-01        | 1.0E+00        |
| 26:0                     | AA unin. vs. NHW unin. | 0.02           | 9.9E-01        | 1.0E+00        | 0.00                | 1.0E+00 | 1.0E+00       | 0.96           | 8.4E-01        | 1.0E+00       | 0.00             | 1.0E+00        | 1.0E+00        |
|                          | AA tumor vs. NHW tumor | -0.10          | 9.3E-01        | 1.0E+00        | -0.01               | 9.9E-01 | 1.0E+00       | 1.42           | 7.6E-01        | 1.0E+00       | -0.02            | 9.9E-01        | 1.0E+00        |
| LUAD                     |                        | LCBs           |                |                |                     |         |               |                |                |               |                  |                |                |
| species                  | comparison             | means diff.    | p              | p-adj. (q)     |                     |         |               |                |                |               |                  |                |                |
| d18:1 So                 | AA unin. vs. NHW unin. | -1.00          | 3.8E-01        | 3.3E-01        |                     |         |               |                |                |               |                  |                |                |
|                          | AA tumor vs. NHW tumor | -3.41          | <b>1.3E-03</b> | <b>6.7E-03</b> |                     |         |               |                |                |               |                  |                |                |
| d18:0 Sa                 | AA unin. vs. NHW unin. | -0.66          | 7.5E-02        | 9.8E-02        |                     |         |               |                |                |               |                  |                |                |
|                          | AA tumor vs. NHW tumor | -0.97          | <b>5.1E-03</b> | <b>2.7E-02</b> |                     |         |               |                |                |               |                  |                |                |
| d18:1 So1P               | AA unin. vs. NHW unin. | 0.00           | 9.6E-01        | 1.0E+00        |                     |         |               |                |                |               |                  |                |                |
|                          | AA tumor vs. NHW tumor | 0.01           | 7.0E-01        | 8.8E-01        |                     |         |               |                |                |               |                  |                |                |
| d18:0 Sa1P               | AA unin. vs. NHW unin. | 0.00           | 9.5E-01        | 9.9E-01        |                     |         |               |                |                |               |                  |                |                |
|                          | AA tumor vs. NHW tumor | -0.01          | 6.8E-01        | 9.9E-01        |                     |         |               |                |                |               |                  |                |                |

**Supplemental Table S16.** Uncorrected (p) and FDR/BKY-adjusted (Q=0.05) p-values (q) for comparisons between AA unin. vs NHW unin. and AA tumor vs NHW tumor tissues of males with LUAD. Means difference (means diff.) positive values indicate levels of the corresponding lipid are higher in the tissues of AA, whereas means diff. negative values indicate levels of the corresponding lipid species are lower in the tissues of AA. The lower limit of p- and q-value calculations were set to 1.0E-15 (Prism), so no values are reported lower than this limit. Alterations considered significant ( $\alpha \leq 0.05$ ,  $q \leq 0.05$ ) are in bold text. Means differences were calculated following ANOVA analysis (Prism).



| acyl<br>chain-<br>length | EEC                    | ceramide       |                |                | monohexosylceramide |                |                | sphingomyelin  |                |                | lactosylceramide |                |                |
|--------------------------|------------------------|----------------|----------------|----------------|---------------------|----------------|----------------|----------------|----------------|----------------|------------------|----------------|----------------|
|                          | comparison             | means<br>diff. | p              | p-adj.<br>(q)  | means<br>diff.      | p              | p-adj.<br>(q)  | means<br>diff. | p              | p-adj.<br>(q)  | means<br>diff.   | p              | p-adj.<br>(q)  |
| 14:0                     | AA unin. vs. NHW unin. | -0.01          | 9.9E-01        | 1.0E+00        | -0.05               | 9.7E-01        | 9.7E-01        | -1.51          | 3.5E-01        | 2.2E-01        | -0.03            | 9.8E-01        | 1.0E+00        |
|                          | AA tumor vs. NHW tumor | -0.06          | 9.5E-01        | 1.0E+00        | -0.10               | 9.4E-01        | 9.7E-01        | 1.19           | 4.7E-01        | 2.5E-01        | 0.12             | 9.2E-01        | 1.0E+00        |
| 16:0                     | AA unin. vs. NHW unin. | 0.02           | 9.8E-01        | 1.0E+00        | -0.87               | 4.7E-01        | 4.7E-01        | -0.54          | 7.4E-01        | 7.7E-01        | -0.81            | 5.2E-01        | 9.0E-02        |
|                          | AA tumor vs. NHW tumor | -0.78          | 4.0E-01        | 5.0E-01        | -4.80               | <b>1.1E-04</b> | <b>1.6E-04</b> | 1.02           | 5.5E-01        | 6.9E-01        | -2.77            | <b>2.9E-02</b> | <b>6.0E-03</b> |
| 18:1                     | AA unin. vs. NHW unin. | 0.00           | 1.0E+00        | 1.0E+00        | -0.08               | 9.4E-01        | 9.5E-01        | -0.09          | 9.6E-01        | 1.0E+00        | -0.06            | 9.6E-01        | 1.0E+00        |
|                          | AA tumor vs. NHW tumor | -0.02          | 9.8E-01        | 1.0E+00        | -0.15               | 9.1E-01        | 9.5E-01        | 0.06           | 9.7E-01        | 1.0E+00        | -0.02            | 9.9E-01        | 1.0E+00        |
| 18:0                     | AA unin. vs. NHW unin. | -0.01          | 9.9E-01        | 1.0E+00        | -0.11               | 9.3E-01        | 9.3E-01        | -1.07          | 5.1E-01        | 7.3E-01        | -0.10            | 9.3E-01        | 1.0E+00        |
|                          | AA tumor vs. NHW tumor | -0.13          | 8.9E-01        | 1.0E+00        | -0.11               | 9.3E-01        | 9.3E-01        | -0.87          | 6.0E-01        | 7.3E-01        | 0.09             | 9.4E-01        | 1.0E+00        |
| 20:0                     | AA unin. vs. NHW unin. | -0.06          | 9.5E-01        | 1.0E+00        | -0.18               | 8.8E-01        | 9.9E-01        | -1.27          | 4.3E-01        | 9.8E-01        | -0.02            | 9.9E-01        | 1.0E+00        |
|                          | AA tumor vs. NHW tumor | -0.12          | 8.9E-01        | 1.0E+00        | 0.02                | 9.9E-01        | 9.9E-01        | 0.07           | 9.6E-01        | 1.0E+00        | 0.06             | 9.6E-01        | 1.0E+00        |
| 22:0                     | AA unin. vs. NHW unin. | -0.42          | 6.4E-01        | 2.2E-01        | -0.88               | 4.6E-01        | 4.6E-01        | -1.25          | 4.4E-01        | 2.8E-01        | -0.14            | 9.1E-01        | 9.5E-01        |
|                          | AA tumor vs. NHW tumor | -0.67          | 4.6E-01        | 1.9E-01        | -1.18               | 3.4E-01        | 4.0E-01        | -1.04          | 5.3E-01        | 2.8E-01        | 0.18             | 8.8E-01        | 9.5E-01        |
| 24:1                     | AA unin. vs. NHW unin. | -1.18          | 1.9E-01        | <b>3.3E-02</b> | -0.97               | 4.2E-01        | 5.1E-01        | -1.29          | 4.3E-01        | 7.4E-02        | -0.43            | 7.3E-01        | 7.6E-01        |
|                          | AA tumor vs. NHW tumor | -4.03          | <b>1.5E-05</b> | <b>3.2E-06</b> | -0.79               | 5.2E-01        | 5.2E-01        | -3.68          | <b>2.6E-02</b> | <b>5.5E-03</b> | -0.86            | 5.0E-01        | 6.2E-01        |
| 24:0                     | AA unin. vs. NHW unin. | 0.19           | 8.3E-01        | 2.9E-01        | -1.30               | 2.8E-01        | 2.8E-01        | -0.60          | 7.1E-01        | 2.5E-01        | -0.15            | 9.0E-01        | 3.2E-01        |
|                          | AA tumor vs. NHW tumor | 1.03           | 2.7E-01        | 1.1E-01        | -1.67               | 1.7E-01        | 2.1E-01        | -3.11          | 6.0E-02        | <b>2.5E-02</b> | 1.38             | 2.7E-01        | 1.1E-01        |
| 26:1                     | AA unin. vs. NHW unin. | -0.01          | 9.9E-01        | 1.0E+00        | -0.04               | 9.7E-01        | 9.7E-01        | -0.07          | 9.7E-01        | 1.0E+00        | -0.01            | 9.9E-01        | 1.0E+00        |
|                          | AA tumor vs. NHW tumor | -0.25          | 7.8E-01        | 9.9E-01        | -0.16               | 9.0E-01        | 9.7E-01        | -0.47          | 7.8E-01        | 9.8E-01        | -0.03            | 9.8E-01        | 1.0E+00        |
| 26:0                     | AA unin. vs. NHW unin. | 0.00           | 1.0E+00        | 1.0E+00        | -0.02               | 9.9E-01        | 9.9E-01        | 0.05           | 9.8E-01        | 1.0E+00        | 0.00             | 1.0E+00        | 1.0E+00        |
|                          | AA tumor vs. NHW tumor | -0.40          | 6.7E-01        | 1.0E+00        | -0.50               | 6.8E-01        | 9.8E-01        | -0.87          | 6.0E-01        | 7.5E-01        | -0.01            | 9.9E-01        | 1.0E+00        |
| EEC                      |                        | LCBs           |                |                |                     |                |                |                |                |                |                  |                |                |
| species                  | comparison             | means diff.    | p              | p-adj. (q)     |                     |                |                |                |                |                |                  |                |                |
| d18:1 So                 | AA unin. vs. NHW unin. | -5.83          | 9.0E-01        | 1.6E-01        |                     |                |                |                |                |                |                  |                |                |
|                          | AA tumor vs. NHW tumor | 134.84         | <b>4.4E-03</b> | <b>1.5E-03</b> |                     |                |                |                |                |                |                  |                |                |
| d18:0 Sa                 | AA unin. vs. NHW unin. | 0.65           | 8.5E-01        | 3.0E-01        |                     |                |                |                |                |                |                  |                |                |
|                          | AA tumor vs. NHW tumor | -1.05          | 7.5E-01        | 3.0E-01        |                     |                |                |                |                |                |                  |                |                |
| d18:1 So1P               | AA unin. vs. NHW unin. | -0.22          | 8.4E-01        | 8.8E-01        |                     |                |                |                |                |                |                  |                |                |
|                          | AA tumor vs. NHW tumor | -1.19          | 2.9E-01        | 6.1E-01        |                     |                |                |                |                |                |                  |                |                |
| d18:0 Sa1P               | AA unin. vs. NHW unin. | -0.27          | 7.9E-01        | 9.8E-01        |                     |                |                |                |                |                |                  |                |                |
|                          | AA tumor vs. NHW tumor | -1.55          | 1.4E-01        | 3.0E-01        |                     |                |                |                |                |                |                  |                |                |

**Supplemental Table S17.** Uncorrected (p) and FDR/BKY-adjusted (Q=0.05) p-values (q) for comparisons between AA unin. vs NHW unin. and AA tumor vs NHW tumor tissues of females with EEC. Means difference (means diff.) positive values indicate levels of the corresponding lipid are higher in the tissues of AA, whereas means diff. negative values indicate levels of the corresponding lipid species are lower in the tissues of AA. The lower limit of p- and q-value calculations were set to 1.0E-15 (Prism), so no values are reported lower than this limit. Alterations considered significant ( $\alpha \leq 0.05$ ,  $q \leq 0.05$ ) are in bold text. Means differences were calculated following ANOVA analysis (Prism).

| acyl<br>chain-<br>length | COAD                   | ceramide       |                |                | monohexosylceramide |                |                | sphingomyelin  |                |               | lactosylceramide |                |                |
|--------------------------|------------------------|----------------|----------------|----------------|---------------------|----------------|----------------|----------------|----------------|---------------|------------------|----------------|----------------|
|                          | comparison             | means<br>diff. | p              | p-adj.<br>(q)  | means<br>diff.      | p              | p-adj.<br>(q)  | means<br>diff. | p              | p-adj.<br>(q) | means<br>diff.   | p              | p-adj.<br>(q)  |
| 14:0                     | AA unin. vs. NHW unin. | 0.02           | 9.9E-01        | 1.0E+00        | 0.03                | 9.7E-01        | 1.0E+00        | -0.80          | 6.0E-01        | 7.6E-01       | -0.04            | 9.8E-01        | 1.0E+00        |
|                          | AA tumor vs. NHW tumor | 0.07           | 9.4E-01        | 1.0E+00        | 0.19                | 8.1E-01        | 1.0E+00        | 0.40           | 8.0E-01        | 8.4E-01       | -0.08            | 9.6E-01        | 1.0E+00        |
| 16:0                     | AA unin. vs. NHW unin. | 0.61           | 5.4E-01        | 3.8E-01        | 0.73                | 3.6E-01        | 1.3E-01        | -1.29          | 4.0E-01        | 3.1E-01       | 1.23             | 4.2E-01        | 7.4E-02        |
|                          | AA tumor vs. NHW tumor | 0.92           | 3.5E-01        | 3.0E-01        | 1.42                | 7.4E-02        | <b>3.1E-02</b> | 3.02           | <b>4.9E-02</b> | 6.8E-02       | 6.16             | <b>5.7E-05</b> | <b>1.2E-05</b> |
| 18:1                     | AA unin. vs. NHW unin. | 0.03           | 9.8E-01        | 1.0E+00        | 0.11                | 8.9E-01        | 1.0E+00        | -0.10          | 9.5E-01        | 1.0E+00       | -0.08            | 9.6E-01        | 1.0E+00        |
|                          | AA tumor vs. NHW tumor | 0.05           | 9.6E-01        | 1.0E+00        | 0.19                | 8.1E-01        | 1.0E+00        | 0.05           | 9.8E-01        | 1.0E+00       | 0.03             | 9.8E-01        | 1.0E+00        |
| 18:0                     | AA unin. vs. NHW unin. | 0.02           | 9.9E-01        | 1.0E+00        | 0.07                | 9.3E-01        | 1.0E+00        | -0.15          | 9.2E-01        | 3.2E-01       | 0.04             | 9.8E-01        | 1.0E+00        |
|                          | AA tumor vs. NHW tumor | 0.11           | 9.1E-01        | 1.0E+00        | 0.10                | 9.0E-01        | 1.0E+00        | -0.22          | 8.9E-01        | 3.2E-01       | 0.07             | 9.6E-01        | 1.0E+00        |
| 20:0                     | AA unin. vs. NHW unin. | 0.02           | 9.9E-01        | 1.0E+00        | 0.01                | 9.9E-01        | 1.0E+00        | -0.43          | 7.8E-01        | 8.2E-01       | -0.01            | 1.0E+00        | 1.0E+00        |
|                          | AA tumor vs. NHW tumor | 0.04           | 9.7E-01        | 1.0E+00        | -0.01               | 9.9E-01        | 1.0E+00        | -0.44          | 7.8E-01        | 8.2E-01       | 0.00             | 1.0E+00        | 1.0E+00        |
| 22:0                     | AA unin. vs. NHW unin. | 0.18           | 8.6E-01        | 9.0E-01        | 0.49                | 5.4E-01        | 6.8E-01        | 0.68           | 6.6E-01        | 7.1E-01       | 0.01             | 9.9E-01        | 1.0E+00        |
|                          | AA tumor vs. NHW tumor | 0.25           | 8.0E-01        | 9.0E-01        | -0.13               | 8.7E-01        | 9.1E-01        | -0.64          | 6.8E-01        | 7.1E-01       | 0.11             | 9.4E-01        | 1.0E+00        |
| 24:1                     | AA unin. vs. NHW unin. | 4.97           | <b>6.8E-07</b> | <b>1.8E-07</b> | 0.71                | 3.7E-01        | 2.3E-01        | 0.61           | 6.9E-01        | 9.1E-01       | -0.06            | 9.7E-01        | 1.0E+00        |
|                          | AA tumor vs. NHW tumor | 9.14           | <b>1.0E-15</b> | <b>1.0E-15</b> | 0.59                | 4.6E-01        | 2.4E-01        | 0.04           | 9.8E-01        | 1.0E+00       | 0.91             | 5.5E-01        | 6.9E-01        |
| 24:0                     | AA unin. vs. NHW unin. | 0.61           | 5.4E-01        | 9.5E-02        | 1.98                | <b>1.3E-02</b> | <b>2.8E-03</b> | 0.58           | 7.0E-01        | 8.9E-01       | -0.22            | 8.9E-01        | 9.6E-01        |
|                          | AA tumor vs. NHW tumor | 2.25           | <b>2.4E-02</b> | <b>5.1E-03</b> | 1.29                | 1.1E-01        | <b>1.9E-02</b> | 1.06           | 4.9E-01        | 8.9E-01       | 0.16             | 9.1E-01        | 9.6E-01        |
| 26:1                     | AA unin. vs. NHW unin. | 0.17           | 8.7E-01        | 1.0E+00        | 0.03                | 9.7E-01        | 1.0E+00        | -0.01          | 1.0E+00        | 1.0E+00       | -0.01            | 1.0E+00        | 1.0E+00        |
|                          | AA tumor vs. NHW tumor | 0.40           | 6.9E-01        | 1.0E+00        | 0.04                | 9.6E-01        | 1.0E+00        | 0.05           | 9.7E-01        | 1.0E+00       | -0.01            | 1.0E+00        | 1.0E+00        |
| 26:0                     | AA unin. vs. NHW unin. | 0.03           | 9.8E-01        | 1.0E+00        | 0.08                | 9.2E-01        | 9.7E-01        | 0.06           | 9.7E-01        | 1.0E+00       | 0.00             | 1.0E+00        | 1.0E+00        |
|                          | AA tumor vs. NHW tumor | 0.01           | 9.9E-01        | 1.0E+00        | -0.07               | 9.3E-01        | 9.7E-01        | -0.12          | 9.4E-01        | 1.0E+00       | 0.02             | 9.9E-01        | 1.0E+00        |
| COAD                     |                        | LCBs           |                |                |                     |                |                |                |                |               |                  |                |                |
| species                  | comparison             | means diff.    | p              | p-adj. (q)     |                     |                |                |                |                |               |                  |                |                |
| d18:1 So                 | AA unin. vs. NHW unin. | -0.55          | 7.7E-01        | 4.1E-01        |                     |                |                |                |                |               |                  |                |                |
|                          | AA tumor vs. NHW tumor | -1.62          | 4.0E-01        | 2.5E-01        |                     |                |                |                |                |               |                  |                |                |
| d18:0 Sa                 | AA unin. vs. NHW unin. | -6.03          | <b>4.6E-03</b> | <b>9.8E-04</b> |                     |                |                |                |                |               |                  |                |                |
|                          | AA tumor vs. NHW tumor | -6.84          | <b>1.4E-03</b> | <b>3.6E-04</b> |                     |                |                |                |                |               |                  |                |                |
| d18:1 So1P               | AA unin. vs. NHW unin. | 0.00           | 9.8E-01        | 1.0E+00        |                     |                |                |                |                |               |                  |                |                |
|                          | AA tumor vs. NHW tumor | 0.02           | 7.9E-01        | 1.0E+00        |                     |                |                |                |                |               |                  |                |                |
| d18:0 Sa1P               | AA unin. vs. NHW unin. | -0.08          | 3.9E-01        | 6.0E-01        |                     |                |                |                |                |               |                  |                |                |
|                          | AA tumor vs. NHW tumor | 0.10           | 2.9E-01        | 6.0E-01        |                     |                |                |                |                |               |                  |                |                |

**Supplemental Table S18.** Uncorrected (p) and FDR/BKY-adjusted (Q=0.05) p-values (q) for comparisons between AA unin. vs NHW unin. and AA tumor vs NHW tumor tissues of males with COAD. Means difference (means diff.) positive values indicate levels of the corresponding lipid are higher in the tissues of AA, whereas means diff. negative values indicate levels of the corresponding lipid species are lower in the tissues of AA. The lower limit of p- and q-value calculations were set to 1.0E-15 (Prism), so no values are reported lower than this limit. Alterations considered significant ( $\alpha \leq 0.05$ ,  $q \leq 0.05$ ) are in bold text. Means differences were calculated following ANOVA analysis (Prism).

| acyl<br>chain-<br>length | HCC                    | ceramide           |                |                   | monohexosylceramide |                |                | sphingomyelin  |                |               | lactosylceramide |                |                |
|--------------------------|------------------------|--------------------|----------------|-------------------|---------------------|----------------|----------------|----------------|----------------|---------------|------------------|----------------|----------------|
|                          | comparison             | means<br>diff.     | p              | p-adj.<br>(q)     | means<br>diff.      | p              | p-adj.<br>(q)  | means<br>diff. | p              | p-adj.<br>(q) | means<br>diff.   | p              | p-adj.<br>(q)  |
| <b>14:0</b>              | AA unin. vs. NHW unin. | 0.06               | 9.9E-01        | 1.0E+00           | -0.02               | 9.9E-01        | 1.0E+00        | 2.80           | 4.3E-01        | 8.2E-01       | 0.08             | 9.6E-01        | 1.0E+00        |
|                          | AA tumor vs. NHW tumor | 0.05               | 9.9E-01        | 1.0E+00           | -0.02               | 9.9E-01        | 1.0E+00        | -3.25          | 3.6E-01        | 8.2E-01       | -0.07            | 9.6E-01        | 1.0E+00        |
| <b>16:0</b>              | AA unin. vs. NHW unin. | 0.54               | 8.8E-01        | 9.2E-01           | 0.17                | 8.9E-01        | 9.5E-01        | 4.67           | 1.8E-01        | 7.1E-01       | 4.78             | <b>2.2E-03</b> | <b>3.5E-03</b> |
|                          | AA tumor vs. NHW tumor | -0.57              | 8.7E-01        | 9.2E-01           | -0.58               | 6.2E-01        | 9.5E-01        | 2.65           | 4.5E-01        | 7.1E-01       | -0.83            | 6.0E-01        | 4.0E-01        |
| <b>18:1</b>              | AA unin. vs. NHW unin. | 0.03               | 9.9E-01        | 1.0E+00           | 0.22                | 8.5E-01        | 1.0E+00        | -0.09          | 9.8E-01        | 1.0E+00       | 0.41             | 7.9E-01        | 1.0E+00        |
|                          | AA tumor vs. NHW tumor | -0.76              | 8.3E-01        | 1.0E+00           | 0.18                | 8.8E-01        | 1.0E+00        | -0.22          | 9.5E-01        | 1.0E+00       | -0.24            | 8.8E-01        | 1.0E+00        |
| <b>18:0</b>              | AA unin. vs. NHW unin. | 0.10               | 9.8E-01        | 1.0E+00           | 0.01                | 1.0E+00        | 1.0E+00        | 0.40           | 9.1E-01        | 1.0E+00       | 0.04             | 9.8E-01        | 1.0E+00        |
|                          | AA tumor vs. NHW tumor | -0.25              | 9.5E-01        | 1.0E+00           | 0.00                | 1.0E+00        | 1.0E+00        | -0.78          | 8.2E-01        | 1.0E+00       | 0.07             | 9.7E-01        | 1.0E+00        |
| <b>20:0</b>              | AA unin. vs. NHW unin. | -0.10              | 9.8E-01        | 1.0E+00           | -0.01               | 9.9E-01        | 1.0E+00        | -0.07          | 9.8E-01        | 1.0E+00       | 0.08             | 9.6E-01        | 1.0E+00        |
|                          | AA tumor vs. NHW tumor | -0.19              | 9.6E-01        | 1.0E+00           | 0.03                | 9.8E-01        | 1.0E+00        | -1.09          | 7.6E-01        | 9.5E-01       | -0.01            | 1.0E+00        | 1.0E+00        |
| <b>22:0</b>              | AA unin. vs. NHW unin. | 1.72               | 6.3E-01        | 6.9E-01           | -2.81               | <b>1.7E-02</b> | <b>1.8E-02</b> | 3.79           | 2.8E-01        | 4.1E-01       | -0.28            | 8.6E-01        | 9.0E-01        |
|                          | AA tumor vs. NHW tumor | 5.43               | 1.3E-01        | 6.9E-01           | 0.29                | 8.0E-01        | 4.2E-01        | -3.47          | 3.2E-01        | 4.1E-01       | -0.38            | 8.1E-01        | 9.0E-01        |
| <b>24:1</b>              | AA unin. vs. NHW unin. | 11.77              | <b>1.2E-03</b> | <b>2.5E-03</b>    | 0.10                | 9.4E-01        | 1.0E+00        | 5.56           | 1.1E-01        | 3.6E-01       | 0.81             | 6.0E-01        | 8.5E-01        |
|                          | AA tumor vs. NHW tumor | 7.21               | <b>4.6E-02</b> | 6.4E-02           | -0.05               | 9.7E-01        | 1.0E+00        | -4.75          | 1.8E-01        | 3.7E-01       | 0.51             | 7.5E-01        | 8.5E-01        |
| <b>24:0</b>              | AA unin. vs. NHW unin. | -2.16              | 5.5E-01        | 4.8E-01           | -1.53               | 1.9E-01        | 8.1E-02        | 7.38           | <b>3.7E-02</b> | 1.2E-01       | 0.19             | 9.0E-01        | 9.5E-01        |
|                          | AA tumor vs. NHW tumor | 11.14              | <b>2.1E-03</b> | <b>1.1E-02</b>    | 0.04                | 9.7E-01        | 3.4E-01        | -2.80          | 4.3E-01        | 6.7E-01       | -1.58            | 3.2E-01        | 5.9E-01        |
| <b>26:1</b>              | AA unin. vs. NHW unin. | 0.04               | 9.9E-01        | 1.0E+00           | 0.00                | 1.0E+00        | 1.0E+00        | 0.11           | 9.8E-01        | 1.0E+00       | 0.01             | 9.9E-01        | 1.0E+00        |
|                          | AA tumor vs. NHW tumor | 0.24               | 9.5E-01        | 1.0E+00           | -0.01               | 9.9E-01        | 1.0E+00        | -0.38          | 9.1E-01        | 1.0E+00       | 0.00             | 1.0E+00        | 1.0E+00        |
| <b>26:0</b>              | AA unin. vs. NHW unin. | -0.03              | 9.9E-01        | 1.0E+00           | -0.03               | 9.8E-01        | 1.0E+00        | -0.12          | 9.7E-01        | 1.0E+00       | 0.01             | 9.9E-01        | 1.0E+00        |
|                          | AA tumor vs. NHW tumor | -0.15              | 9.7E-01        | 1.0E+00           | -0.15               | 9.0E-01        | 1.0E+00        | -0.29          | 9.4E-01        | 1.0E+00       | -0.01            | 1.0E+00        | 1.0E+00        |
| <b>HCC</b>               |                        | <b>LCBs</b>        |                |                   |                     |                |                |                |                |               |                  |                |                |
| <b>species</b>           | <b>comparison</b>      | <b>means diff.</b> | <b>p</b>       | <b>p-adj. (q)</b> |                     |                |                |                |                |               |                  |                |                |
| <b>d18:1 So</b>          | AA unin. vs. NHW unin. | 9.11               | <b>4.3E-02</b> | 7.6E-02           |                     |                |                |                |                |               |                  |                |                |
|                          | AA tumor vs. NHW tumor | 6.15               | 1.7E-01        | 1.8E-01           |                     |                |                |                |                |               |                  |                |                |
| <b>d18:0 Sa</b>          | AA unin. vs. NHW unin. | 8.08               | <b>7.7E-04</b> | <b>9.9E-04</b>    |                     |                |                |                |                |               |                  |                |                |
|                          | AA tumor vs. NHW tumor | 3.05               | 1.9E-01        | 1.2E-01           |                     |                |                |                |                |               |                  |                |                |
| <b>d18:1 So1P</b>        | AA unin. vs. NHW unin. | -0.16              | 9.7E-01        | 9.7E-01           |                     |                |                |                |                |               |                  |                |                |
|                          | AA tumor vs. NHW tumor | -0.07              | 9.9E-01        | 9.9E-01           |                     |                |                |                |                |               |                  |                |                |
| <b>d18:0 Sa1P</b>        | AA unin. vs. NHW unin. | 0.00               | 1.0E+00        | 1.0E+00           |                     |                |                |                |                |               |                  |                |                |
|                          | AA tumor vs. NHW tumor | 0.00               | 1.0E+00        | 1.0E+00           |                     |                |                |                |                |               |                  |                |                |

**Supplemental Table S19.** Uncorrected (p) and FDR/BKY-adjusted (Q=0.05) p-values (q) for comparisons between AA unin. vs NHW unin. and AA tumor vs NHW tumor tissues of males with HCC. Means difference (means diff.) positive values indicate levels of the corresponding lipid are higher in the tissues of AA, whereas means diff. negative values indicate levels of the corresponding lipid species are lower in the tissues of AA. The lower limit of p- and q-value calculations were set to 1.0E-15 (Prism), so no values are reported lower than this limit. Alterations considered significant ( $\alpha \leq 0.05$ ,  $q \leq 0.05$ ) are in bold text. Means differences were calculated following ANOVA analysis (Prism).

| acyl<br>chain-<br>length | HNSCC                  | ceramide       |         |               | monohexosylceramide |         |               | sphingomyelin  |         |               | lactosylceramide |         |               |
|--------------------------|------------------------|----------------|---------|---------------|---------------------|---------|---------------|----------------|---------|---------------|------------------|---------|---------------|
|                          | comparison             | means<br>diff. | p       | p-adj.<br>(q) | means<br>diff.      | p       | p-adj.<br>(q) | means<br>diff. | p       | p-adj.<br>(q) | means<br>diff.   | p       | p-adj.<br>(q) |
| 14:0                     | AA unin. vs. NHW unin. | -0.09          | 9.5E-01 | 1.0E+00       | -0.08               | 9.7E-01 | 1.0E+00       | -6.38          | 1.6E-01 | 3.3E-01       | -0.10            | 9.8E-01 | 1.0E+00       |
|                          | AA tumor vs. NHW tumor | 0.62           | 7.0E-01 | 1.0E+00       | 0.20                | 9.3E-01 | 1.0E+00       | -1.32          | 7.8E-01 | 8.1E-01       | -0.10            | 9.8E-01 | 1.0E+00       |
| 16:0                     | AA unin. vs. NHW unin. | 0.17           | 9.1E-01 | 1.6E-01       | -2.53               | 2.8E-01 | 1.8E-01       | 8.58           | 5.7E-02 | 2.1E-01       | -9.56            | 2.9E-02 | 6.1E-03       |
|                          | AA tumor vs. NHW tumor | 3.47           | 3.2E-02 | 6.8E-03       | 8.70                | 3.4E-04 | 3.6E-04       | -1.47          | 7.5E-01 | 9.5E-01       | 8.73             | 5.1E-02 | 9.0E-03       |
| 18:1                     | AA unin. vs. NHW unin. | 0.00           | 1.0E+00 | 1.0E+00       | 0.00                | 1.0E+00 | 1.0E+00       | -1.34          | 7.7E-01 | 1.0E+00       | -0.04            | 9.9E-01 | 1.0E+00       |
|                          | AA tumor vs. NHW tumor | -0.10          | 9.5E-01 | 1.0E+00       | 0.03                | 9.9E-01 | 1.0E+00       | 0.04           | 9.9E-01 | 1.0E+00       | 0.11             | 9.8E-01 | 1.0E+00       |
| 18:0                     | AA unin. vs. NHW unin. | -0.01          | 1.0E+00 | 1.0E+00       | 0.05                | 9.8E-01 | 1.0E+00       | 2.55           | 5.7E-01 | 7.2E-01       | -0.35            | 9.4E-01 | 1.0E+00       |
|                          | AA tumor vs. NHW tumor | 0.78           | 6.3E-01 | 9.5E-01       | 0.77                | 7.5E-01 | 1.0E+00       | -0.02          | 1.0E+00 | 1.0E+00       | 0.14             | 9.7E-01 | 1.0E+00       |
| 20:0                     | AA unin. vs. NHW unin. | -0.05          | 9.7E-01 | 1.0E+00       | 0.00                | 1.0E+00 | 1.0E+00       | -3.00          | 5.1E-01 | 1.0E+00       | -0.10            | 9.8E-01 | 1.0E+00       |
|                          | AA tumor vs. NHW tumor | 1.92           | 2.4E-01 | 5.0E-01       | 1.43                | 5.5E-01 | 1.0E+00       | 0.61           | 8.9E-01 | 1.0E+00       | 0.23             | 9.6E-01 | 1.0E+00       |
| 22:0                     | AA unin. vs. NHW unin. | -0.54          | 7.3E-01 | 5.1E-01       | -0.13               | 9.6E-01 | 1.0E+00       | -3.44          | 4.5E-01 | 1.0E+00       | -1.33            | 7.6E-01 | 9.6E-01       |
|                          | AA tumor vs. NHW tumor | 1.60           | 3.2E-01 | 2.7E-01       | 5.27                | 2.9E-02 | 1.8E-01       | -0.02          | 1.0E+00 | 1.0E+00       | 0.07             | 9.9E-01 | 1.0E+00       |
| 24:1                     | AA unin. vs. NHW unin. | -2.07          | 1.9E-01 | 1.0E-01       | 0.84                | 7.2E-01 | 4.9E-01       | 0.85           | 8.5E-01 | 1.0E+00       | -5.73            | 1.9E-01 | 8.0E-02       |
|                          | AA tumor vs. NHW tumor | 2.17           | 1.8E-01 | 1.0E-01       | 6.14                | 1.1E-02 | 1.4E-02       | -0.17          | 9.7E-01 | 1.0E+00       | -5.34            | 2.3E-01 | 8.1E-02       |
| 24:0                     | AA unin. vs. NHW unin. | -0.78          | 6.2E-01 | 1.1E-01       | -1.59               | 5.0E-01 | 3.2E-01       | -2.21          | 6.2E-01 | 6.6E-01       | -4.64            | 2.9E-01 | 1.2E-01       |
|                          | AA tumor vs. NHW tumor | 5.39           | 9.5E-04 | 2.0E-04       | 10.40               | 2.0E-05 | 2.1E-05       | 2.71           | 5.6E-01 | 6.6E-01       | -2.60            | 5.6E-01 | 2.0E-01       |
| 26:1                     | AA unin. vs. NHW unin. | -0.11          | 9.4E-01 | 9.9E-01       | 0.18                | 9.4E-01 | 9.9E-01       | 0.20           | 9.6E-01 | 1.0E+00       | -0.90            | 8.4E-01 | 1.0E+00       |
|                          | AA tumor vs. NHW tumor | 0.60           | 7.1E-01 | 8.9E-01       | 4.44                | 6.6E-02 | 1.4E-01       | 0.04           | 9.9E-01 | 1.0E+00       | -0.30            | 9.5E-01 | 1.0E+00       |
| 26:0                     | AA unin. vs. NHW unin. | -0.19          | 9.0E-01 | 3.2E-01       | 1.93                | 4.1E-01 | 8.3E-01       | -0.10          | 9.8E-01 | 1.0E+00       | -1.26            | 7.7E-01 | 1.0E+00       |
|                          | AA tumor vs. NHW tumor | 1.43           | 3.8E-01 | 1.6E-01       | 1.72                | 4.8E-01 | 8.3E-01       | 0.20           | 9.7E-01 | 1.0E+00       | 0.41             | 9.3E-01 | 1.0E+00       |

| HNSCC      |                        | LCBs        |         |            |
|------------|------------------------|-------------|---------|------------|
| species    | comparison             | means diff. | p       | p-adj. (q) |
| d18:1 So   | AA unin. vs. NHW unin. | -13.99      | 7.5E-02 | 1.6E-01    |
|            | AA tumor vs. NHW tumor | -4.00       | 6.2E-01 | 7.8E-01    |
| d18:0 Sa   | AA unin. vs. NHW unin. | -0.27       | 9.4E-01 | 9.9E-01    |
|            | AA tumor vs. NHW tumor | -4.61       | 2.1E-01 | 7.3E-01    |
| d18:1 So1P | AA unin. vs. NHW unin. | -0.84       | 7.5E-02 | 1.6E-01    |
|            | AA tumor vs. NHW tumor | -0.12       | 8.0E-01 | 1.0E+00    |
| d18:0 Sa1P | AA unin. vs. NHW unin. | 0.02        | 9.7E-01 | 1.0E+00    |
|            | AA tumor vs. NHW tumor | -0.03       | 9.5E-01 | 1.0E+00    |

**Supplemental Table S20.** Uncorrected (p) and FDR/BKY-adjusted (Q=0.05) p-values (q) for comparisons between AA unin. vs NHW unin. and AA tumor vs NHW tumor tissues of males with HNSCC. Means difference (means diff.) positive values indicate levels of the corresponding lipid are higher in the tissues of AA, whereas means diff. negative values indicate levels of the corresponding lipid species are lower in the tissues of AA. The lower limit of p- and q-value calculations were set to 1.0E-15 (Prism), so no values are reported lower than this limit. Alterations considered significant ( $\alpha \leq 0.05$ ,  $q \leq 0.05$ ) are in bold text. Means differences were calculated following ANOVA analysis (Prism).

| <i>acyl<br/>chain-<br/>length</i> | Pan-cancer        | ceramide               |                |                   | monohexosylceramide    |                |                   | sphingomyelin          |          |                   | lactosylceramide       |                |                   |
|-----------------------------------|-------------------|------------------------|----------------|-------------------|------------------------|----------------|-------------------|------------------------|----------|-------------------|------------------------|----------------|-------------------|
|                                   | <i>comparison</i> | <i>means<br/>diff.</i> | <i>p</i>       | <i>p-adj. (q)</i> | <i>means<br/>diff.</i> | <i>p</i>       | <i>p-adj. (q)</i> | <i>means<br/>diff.</i> | <i>p</i> | <i>p-adj. (q)</i> | <i>means<br/>diff.</i> | <i>p</i>       | <i>p-adj. (q)</i> |
| <b>14:0</b>                       | unin. vs tumor    | 0.3                    | 6.6E-01        | 5.1E-01           | 0.2                    | 7.1E-01        | 6.3E-01           | 1.9                    | 1.2E-01  | 2.5E-01           | 0.1                    | 8.9E-01        | 7.2E-01           |
| <b>16:0</b>                       | unin. vs tumor    | 2.8                    | <b>1.3E-06</b> | <b>2.6E-06</b>    | 4.1                    | <b>1.0E-15</b> | <b>1.0E-15</b>    | 2.1                    | 8.4E-02  | 2.5E-01           | 12.9                   | <b>1.0E-15</b> | <b>1.0E-15</b>    |
| <b>18:1</b>                       | unin. vs tumor    | 0.1                    | 8.8E-01        | 5.5E-01           | 0.1                    | 8.6E-01        | 6.3E-01           | -0.4                   | 7.6E-01  | 8.8E-01           | 0.1                    | 9.1E-01        | 7.2E-01           |
| <b>18:0</b>                       | unin. vs tumor    | 0.2                    | 7.3E-01        | 5.1E-01           | 0.1                    | 8.1E-01        | 6.3E-01           | -2.1                   | 8.8E-02  | 2.5E-01           | 0.1                    | 8.6E-01        | 7.2E-01           |
| <b>20:0</b>                       | unin. vs tumor    | 0.4                    | 5.0E-01        | 4.5E-01           | 0.2                    | 7.2E-01        | 6.3E-01           | -0.9                   | 4.4E-01  | 6.6E-01           | 0.0                    | 9.5E-01        | 7.2E-01           |
| <b>22:0</b>                       | unin. vs tumor    | 1.7                    | <b>2.6E-03</b> | <b>4.1E-03</b>    | 0.6                    | 1.6E-01        | 2.7E-01           | -0.2                   | 8.4E-01  | 8.8E-01           | 0.8                    | 3.1E-01        | 5.6E-01           |
| <b>24:1</b>                       | unin. vs tumor    | 6.6                    | <b>1.0E-15</b> | <b>1.0E-15</b>    | 3.4                    | <b>2.0E-15</b> | <b>4.0E-15</b>    | 1.9                    | 1.2E-01  | 2.5E-01           | 5.0                    | <b>4.2E-10</b> | <b>1.5E-09</b>    |
| <b>24:0</b>                       | unin. vs tumor    | 5.7                    | <b>1.0E-15</b> | <b>1.0E-15</b>    | 4.9                    | <b>1.0E-15</b> | <b>1.0E-15</b>    | 2.3                    | 6.0E-02  | 2.5E-01           | 3.3                    | <b>3.9E-05</b> | <b>9.6E-05</b>    |
| <b>26:1</b>                       | unin. vs tumor    | 0.4                    | 5.0E-01        | 4.5E-01           | 0.6                    | 1.8E-01        | 2.7E-01           | 0.9                    | 4.3E-01  | 6.6E-01           | 0.2                    | 8.4E-01        | 7.2E-01           |
| <b>26:0</b>                       | unin. vs tumor    | 1.1                    | <b>4.9E-02</b> | 6.2E-02           | 0.2                    | 5.6E-01        | 6.3E-01           | 0.4                    | 7.6E-01  | 8.8E-01           | 0.0                    | 9.7E-01        | 7.2E-01           |

| <i>species</i>    | Pan-cancer        | sphingoid bases    |                |                   |
|-------------------|-------------------|--------------------|----------------|-------------------|
|                   | <i>comparison</i> | <i>means diff.</i> | <i>p</i>       | <i>p-adj. (q)</i> |
| <b>d18:1 So</b>   | unin. vs tumor    | 17.54              | <b>6.2E-05</b> | <b>2.0E-04</b>    |
| <b>d18:0 Sa</b>   | unin. vs tumor    | 2.14               | <b>4.6E-03</b> | <b>9.7E-03</b>    |
| <b>d18:1 So1P</b> | unin. vs tumor    | 0.07               | 5.0E-01        | 5.3E-01           |
| <b>d18:0 Sa1P</b> | unin. vs tumor    | 0.12               | 2.2E-01        | 4.7E-01           |

**Supplemental Table S21.** Uncorrected (p) and FDR/BKY-adjusted (Q=0.05) p-values (q) for comparisons using data pooled from AA and NHW subjects with LUAD, EEC, COAD, and HNSCC. Comparisons were made between unin. vs tumor tissues. Means diff. values that are positive indicate that the corresponding lipid species is higher in the tumor than in the unin. tissue. The lower limit of p- and q-value calculations were set to 1.0E-15 (Prism), so no values are reported lower than this limit. Alterations considered significant ( $\alpha \leq 0.05$ ,  $q \leq 0.05$ ) are in bold text. Means differences were calculated following ANOVA analysis (Prism).

| acyl<br>chain-<br>length | Pan-cancer             | ceramide       |                |                | monohexosylceramide |                |                | sphingomyelin  |         |               | lactosylceramide |                |                |
|--------------------------|------------------------|----------------|----------------|----------------|---------------------|----------------|----------------|----------------|---------|---------------|------------------|----------------|----------------|
|                          | comparison             | means<br>diff. | p              | p-adj.<br>(q)  | means<br>diff.      | p              | p-adj.<br>(q)  | means<br>diff. | p       | p-adj.<br>(q) | means<br>diff.   | p              | p-adj.<br>(q)  |
| 14:0                     | AA unin. vs. NHW unin. | 0.00           | 1.0E+00        | 1.0E+00        | 0.00                | 1.0E+00        | 1.0E+00        | 0.31           | 8.6E-01 | 9.0E-01       | -0.03            | 9.8E-01        | 1.0E+00        |
|                          | AA tumor vs. NHW tumor | 0.10           | 9.0E-01        | 1.0E+00        | 0.11                | 8.6E-01        | 1.0E+00        | 1.37           | 4.2E-01 | 6.6E-01       | -0.06            | 9.6E-01        | 1.0E+00        |
| 16:0                     | AA unin. vs. NHW unin. | 0.31           | 7.1E-01        | 2.7E-01        | -0.07               | 9.1E-01        | 1.6E-01        | 1.90           | 2.7E-01 | 5.6E-01       | -1.16            | 3.1E-01        | 5.3E-02        |
|                          | AA tumor vs. NHW tumor | 0.23           | 7.7E-01        | 2.7E-01        | 1.26                | <b>3.5E-02</b> | <b>7.3E-03</b> | 0.20           | 9.1E-01 | 9.5E-01       | 3.55             | <b>1.6E-03</b> | <b>3.4E-04</b> |
| 18:1                     | AA unin. vs. NHW unin. | 0.03           | 9.7E-01        | 1.0E+00        | 0.06                | 9.2E-01        | 1.0E+00        | 0.52           | 7.6E-01 | 9.3E-01       | 0.03             | 9.8E-01        | 1.0E+00        |
|                          | AA tumor vs. NHW tumor | -0.11          | 9.0E-01        | 1.0E+00        | 0.07                | 9.1E-01        | 1.0E+00        | 0.75           | 6.6E-01 | 9.3E-01       | 0.00             | 1.0E+00        | 1.0E+00        |
| 18:0                     | AA unin. vs. NHW unin. | -0.10          | 9.0E-01        | 9.5E-01        | 0.01                | 9.8E-01        | 1.0E+00        | 1.12           | 5.2E-01 | 6.5E-01       | -0.05            | 9.7E-01        | 1.0E+00        |
|                          | AA tumor vs. NHW tumor | -0.11          | 9.0E-01        | 9.5E-01        | 0.09                | 8.8E-01        | 1.0E+00        | -0.58          | 7.3E-01 | 7.7E-01       | 0.02             | 9.8E-01        | 1.0E+00        |
| 20:0                     | AA unin. vs. NHW unin. | -0.06          | 9.4E-01        | 9.9E-01        | -0.05               | 9.3E-01        | 9.9E-01        | -1.19          | 4.9E-01 | 8.9E-01       | -0.02            | 9.9E-01        | 1.0E+00        |
|                          | AA tumor vs. NHW tumor | 0.12           | 8.8E-01        | 9.9E-01        | 0.18                | 7.6E-01        | 9.9E-01        | -0.68          | 6.9E-01 | 8.9E-01       | 0.01             | 9.9E-01        | 1.0E+00        |
| 22:0                     | AA unin. vs. NHW unin. | -0.15          | 8.6E-01        | 9.0E-01        | -0.51               | 4.0E-01        | 5.1E-01        | 0.87           | 6.1E-01 | 8.2E-01       | -0.35            | 7.5E-01        | 9.5E-01        |
|                          | AA tumor vs. NHW tumor | 0.51           | 5.3E-01        | 6.6E-01        | 0.49                | 4.1E-01        | 5.1E-01        | -1.81          | 2.9E-01 | 8.2E-01       | -0.13            | 9.1E-01        | 9.5E-01        |
| 24:1                     | AA unin. vs. NHW unin. | 3.25           | <b>7.5E-05</b> | <b>8.8E-05</b> | 0.10                | 8.7E-01        | 3.1E-01        | 1.14           | 5.1E-01 | 6.4E-01       | -1.17            | 3.0E-01        | 1.3E-01        |
|                          | AA tumor vs. NHW tumor | 3.54           | <b>1.3E-05</b> | <b>2.1E-05</b> | 0.41                | 4.9E-01        | 2.1E-01        | -1.80          | 2.9E-01 | 6.0E-01       | -0.93            | 4.1E-01        | 1.4E-01        |
| 24:0                     | AA unin. vs. NHW unin. | -0.61          | 4.6E-01        | 8.0E-02        | 0.22                | 7.2E-01        | 1.3E-01        | 0.57           | 7.4E-01 | 8.5E-01       | -1.02            | 3.7E-01        | 2.3E-01        |
|                          | AA tumor vs. NHW tumor | 2.33           | <b>4.0E-03</b> | <b>8.5E-04</b> | 2.26                | <b>1.5E-04</b> | <b>3.2E-05</b> | -0.42          | 8.1E-01 | 8.5E-01       | -0.76            | 5.0E-01        | 2.6E-01        |
| 26:1                     | AA unin. vs. NHW unin. | 0.09           | 9.1E-01        | 9.5E-01        | 0.06                | 9.2E-01        | 9.7E-01        | 0.21           | 9.0E-01 | 1.0E+00       | -0.13            | 9.1E-01        | 1.0E+00        |
|                          | AA tumor vs. NHW tumor | 0.18           | 8.2E-01        | 9.5E-01        | 0.65                | 2.8E-01        | 5.8E-01        | 0.00           | 1.0E+00 | 1.0E+00       | -0.06            | 9.6E-01        | 1.0E+00        |
| 26:0                     | AA unin. vs. NHW unin. | -0.02          | 9.8E-01        | 1.0E+00        | 0.37                | 5.4E-01        | 1.0E+00        | -0.01          | 9.9E-01 | 1.0E+00       | -0.17            | 8.8E-01        | 1.0E+00        |
|                          | AA tumor vs. NHW tumor | 0.12           | 8.8E-01        | 1.0E+00        | 0.18                | 7.7E-01        | 1.0E+00        | -0.05          | 9.8E-01 | 1.0E+00       | 0.06             | 9.6E-01        | 1.0E+00        |

| species    | Pan-cancer             | LCBs        |                |                |
|------------|------------------------|-------------|----------------|----------------|
|            | comparison             | means diff. | p              | p-adj. (q)     |
| d18:1 So   | AA unin. vs. NHW unin. | -1.20       | 8.5E-01        | 4.4E-01        |
|            | AA tumor vs. NHW tumor | 16.64       | <b>7.0E-03</b> | <b>7.4E-03</b> |
| d18:0 Sa   | AA unin. vs. NHW unin. | 0.72        | 5.0E-01        | 4.4E-01        |
|            | AA tumor vs. NHW tumor | -0.79       | 4.6E-01        | 4.4E-01        |
| d18:1 So1P | AA unin. vs. NHW unin. | -0.18       | 2.1E-01        | 5.0E-01        |
|            | AA tumor vs. NHW tumor | -0.17       | 2.4E-01        | 5.0E-01        |
| d18:0 Sa1P | AA unin. vs. NHW unin. | -0.05       | 7.3E-01        | 9.1E-01        |
|            | AA tumor vs. NHW tumor | -0.14       | 3.2E-01        | 6.7E-01        |

**Supplemental Table S22.** Uncorrected (p) and FDR/BKY-adjusted (Q=0.05) p-values (q) for comparisons using data pooled from subjects with LUAD, EEC, COAD, and HNSCC. Comparisons were made between AA unin. vs NHW unin. and AA tumor vs NHW tumor tissues. Means difference (means diff.) positive values indicate levels of the corresponding lipid are higher in the tissues of AA, whereas means diff. negative values indicate levels of the corresponding lipid species are lower in the tissues of AA. The lower limit of p- and q-value calculations were set to 1.0E-15 (Prism), so no values are reported lower than this limit. Alterations considered significant ( $\alpha \leq 0.05$ ,  $q \leq 0.05$ ) are in bold text. Means differences were calculated following ANOVA analysis (Prism).
